# Supplementary material for: Palladium-catalyzed carbonylation of halo arene-cis-dihydrodiols to the corresponding carboxylates. Access to compounds unavailable by toluene dioxygenase-mediated dihydroxylation of the corresponding benzoate esters
Source: Royal Society of Chemistry journal article supplement (doi:10.1039/c4ob01417k), 2014-01-01

## Supplementary Information

### **Palladium-catalyzed carbonylation of halo arene-*cis*-dihydrodiols to the corresponding carboxylates. Access to compounds unavailable by toluene dioxygenase-mediated dihydroxylation of the corresponding benzoate esters**

Jordan Froese, Jason Reed Hudlicky, and Tomas Hudlicky\*

\*Chemistry Department and Centre for Biotechnology, Brock University, 500 Glenridge Avenue,  
St. Catharines, Ontario L2S 3A1, Canada

[thudlicky@brocku.ca](mailto:thudlicky@brocku.ca)

### Table of Contents

|                                                                                                  | <b>Page(s)</b> |
|--------------------------------------------------------------------------------------------------|----------------|
| Copies of $^1\text{H}$ and $^{13}\text{C}$ spectra for compounds <b>15, 18, 22, 24-27, 29-32</b> | S2-S12         |

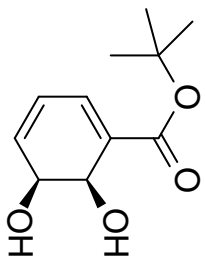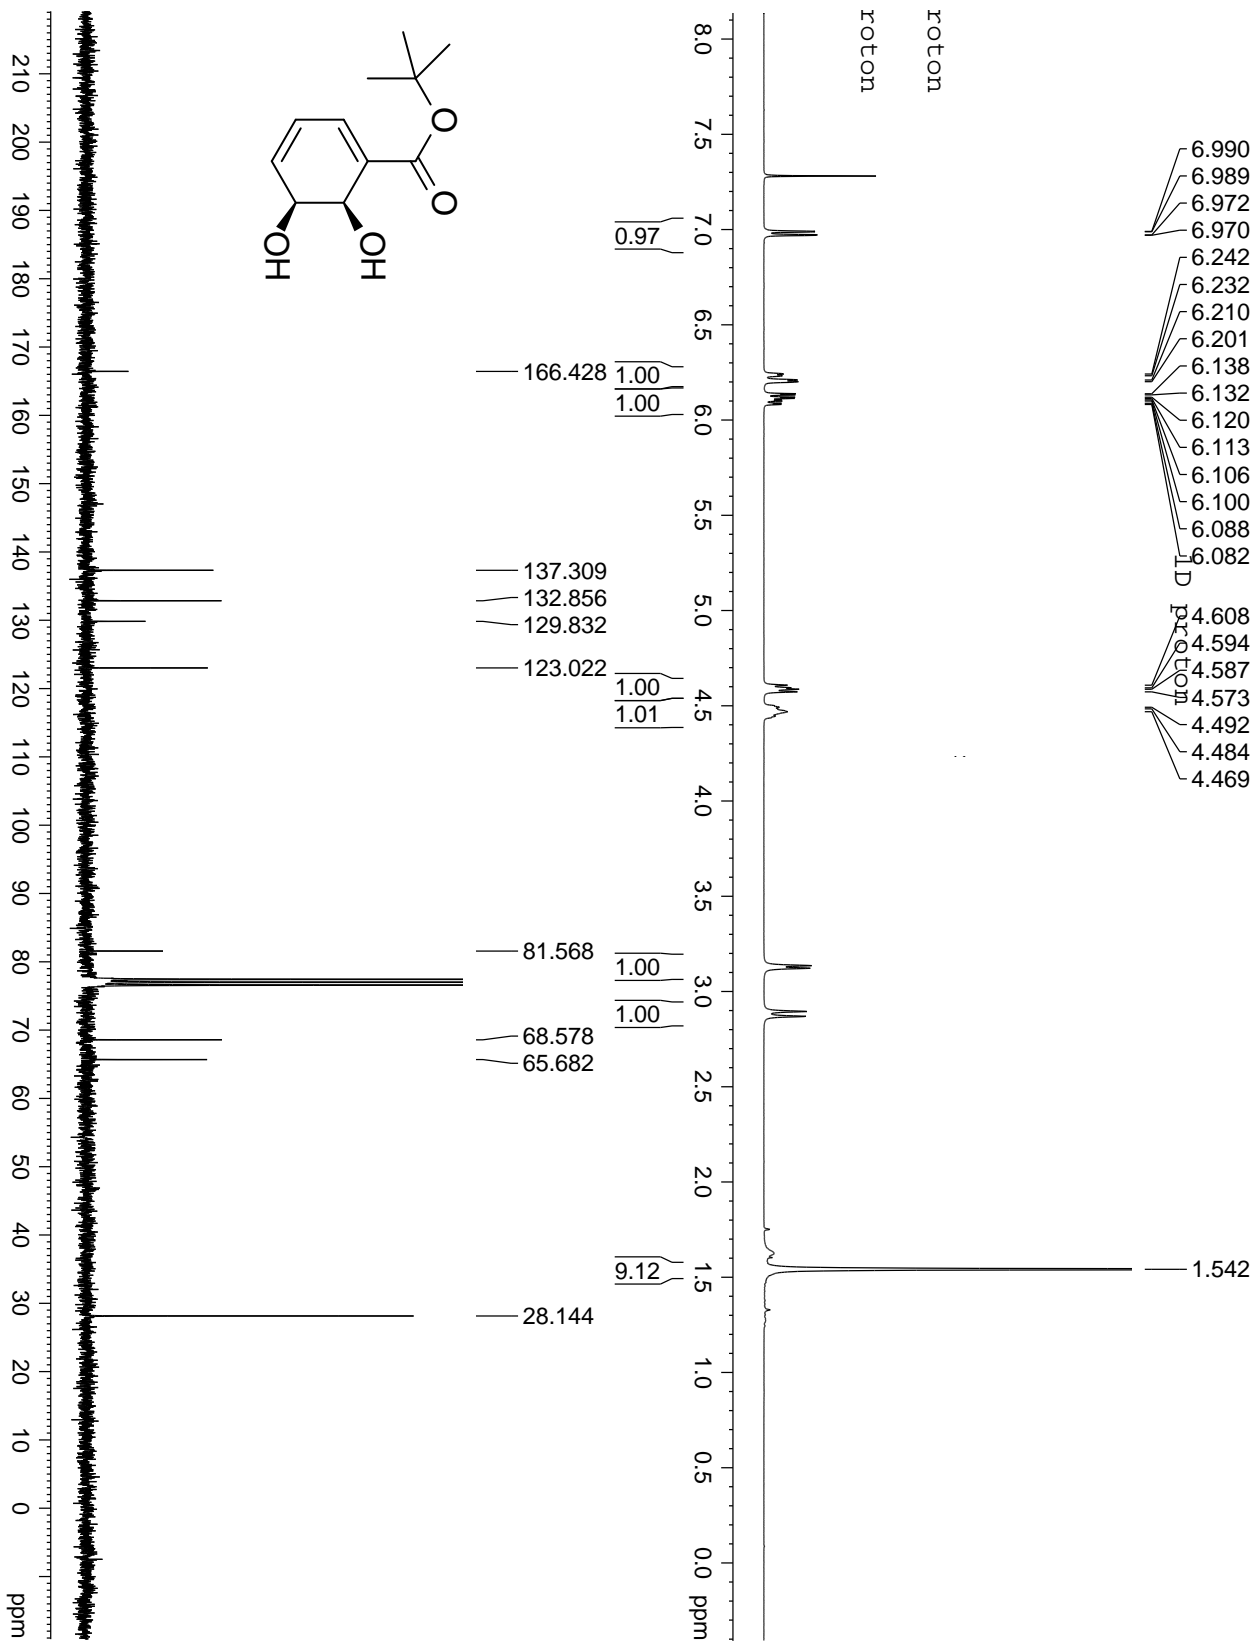

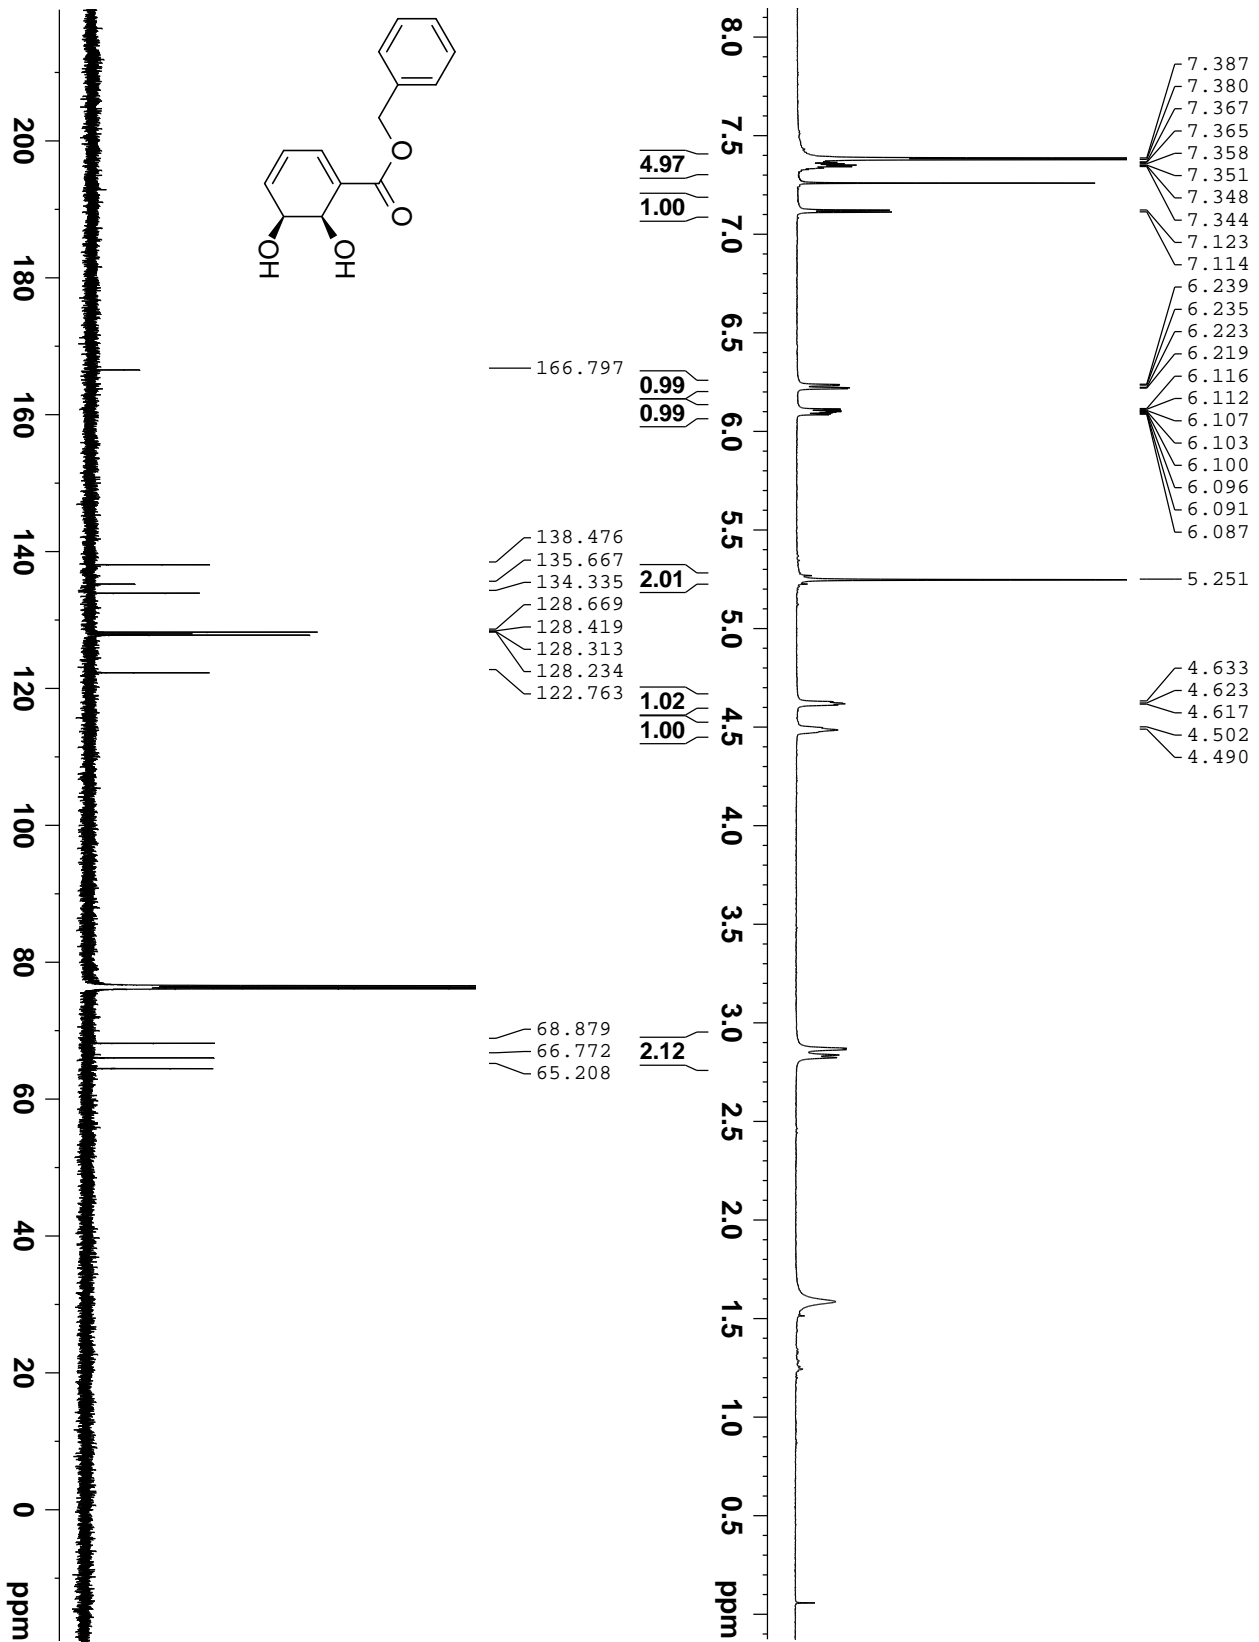

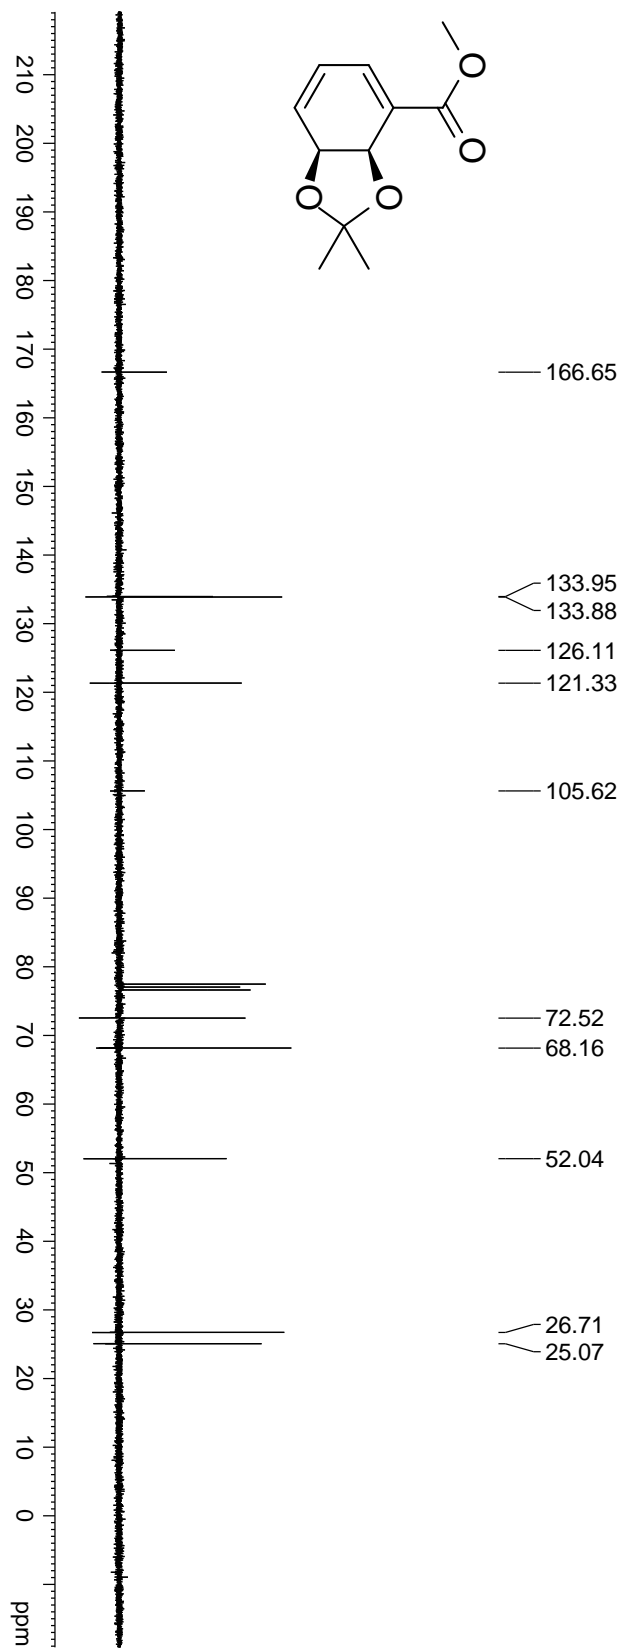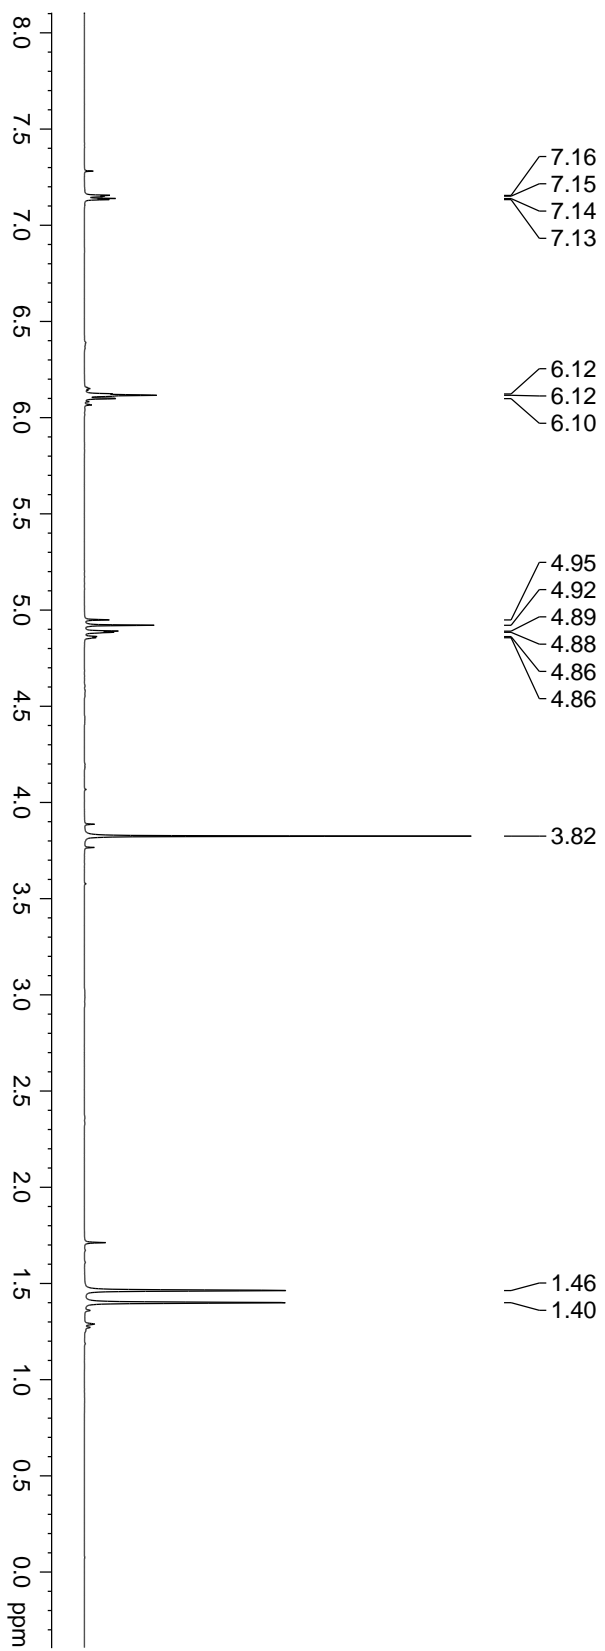

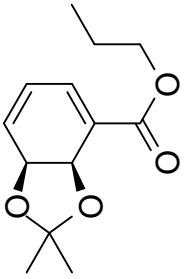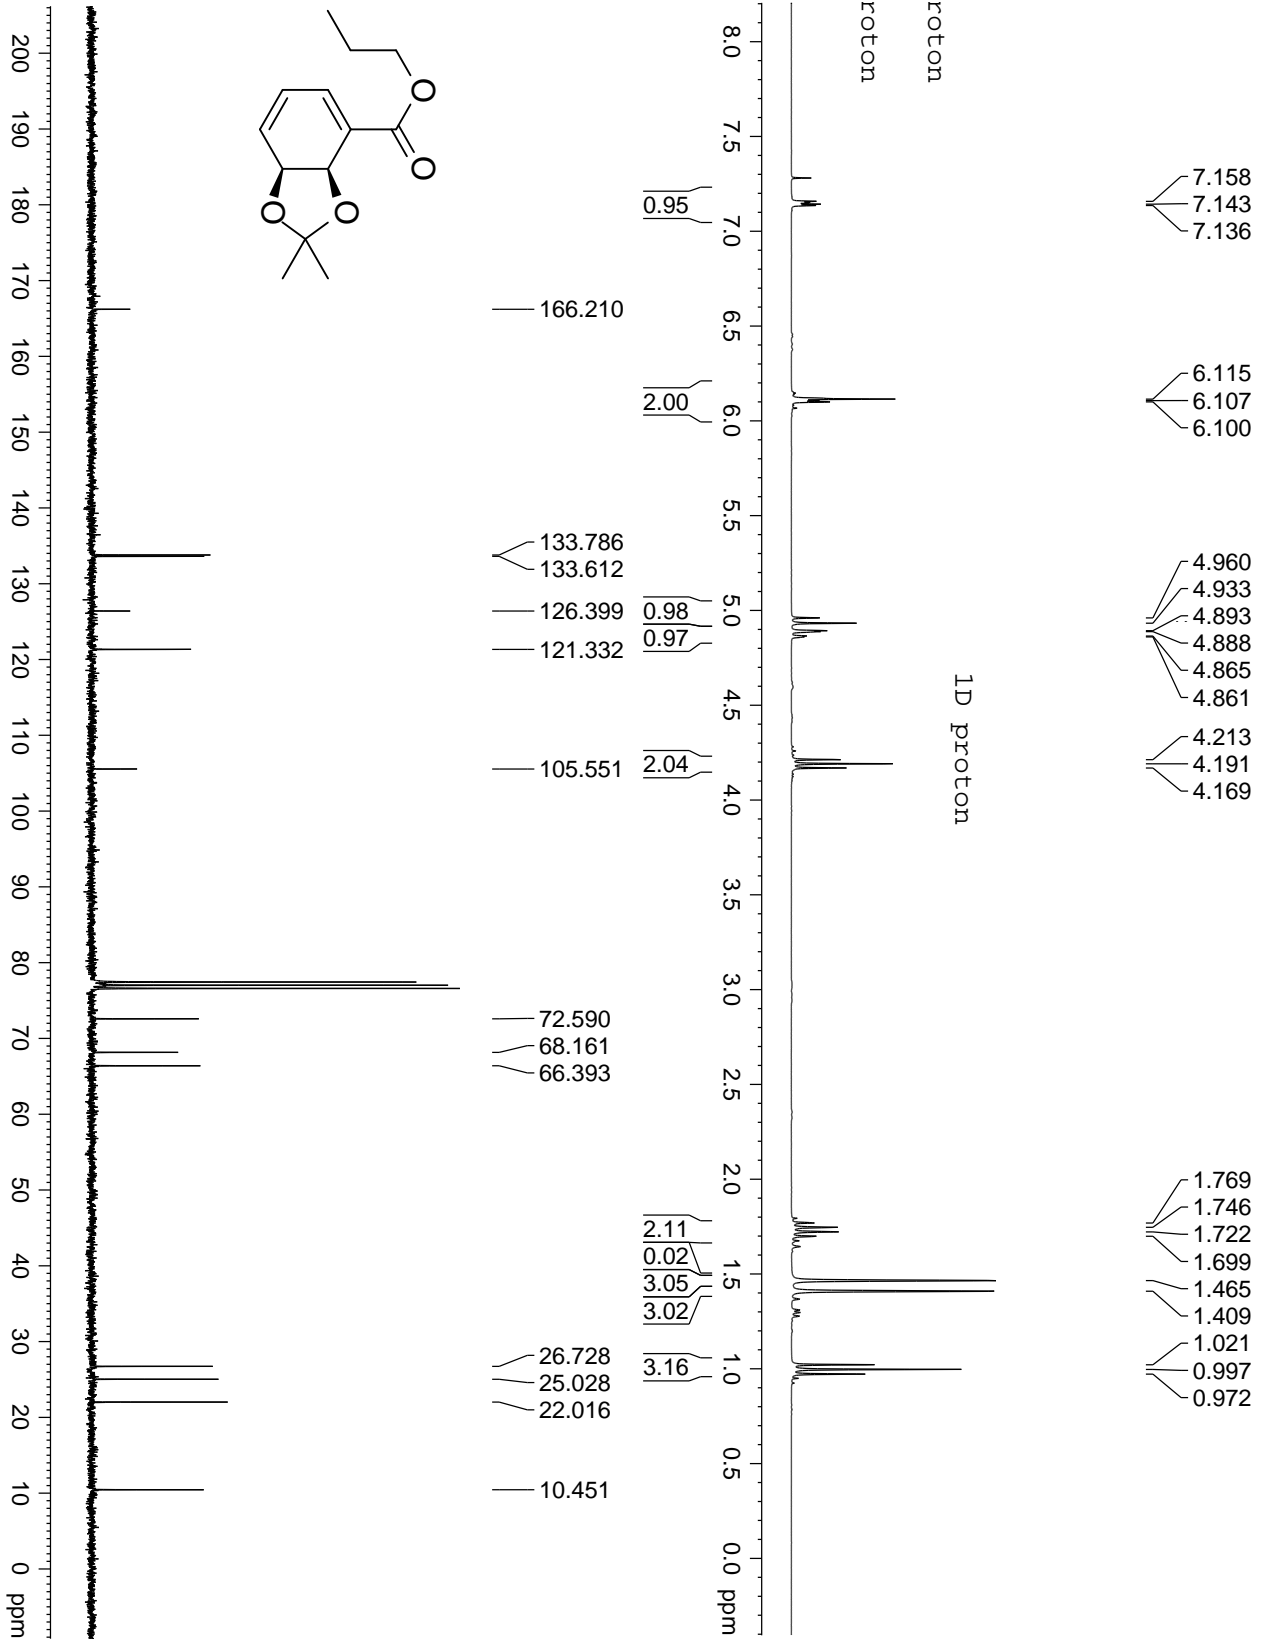

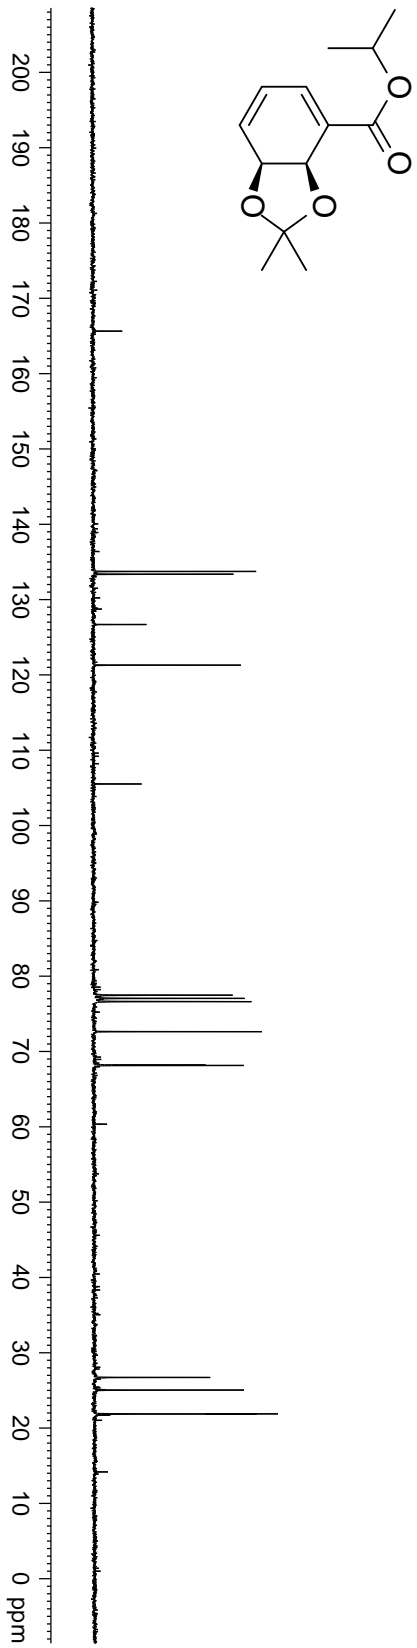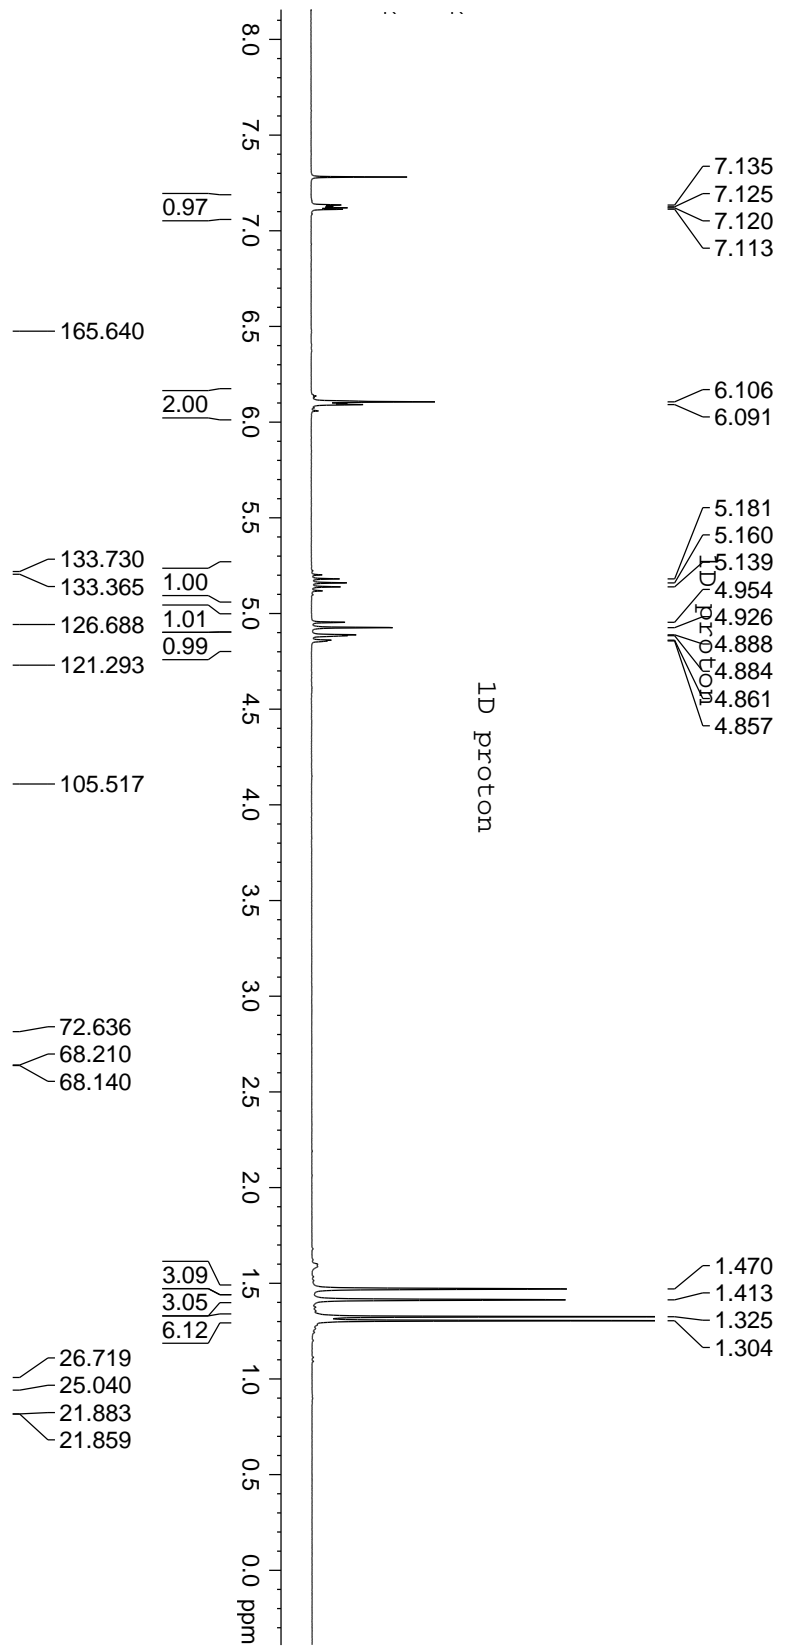

1D proton

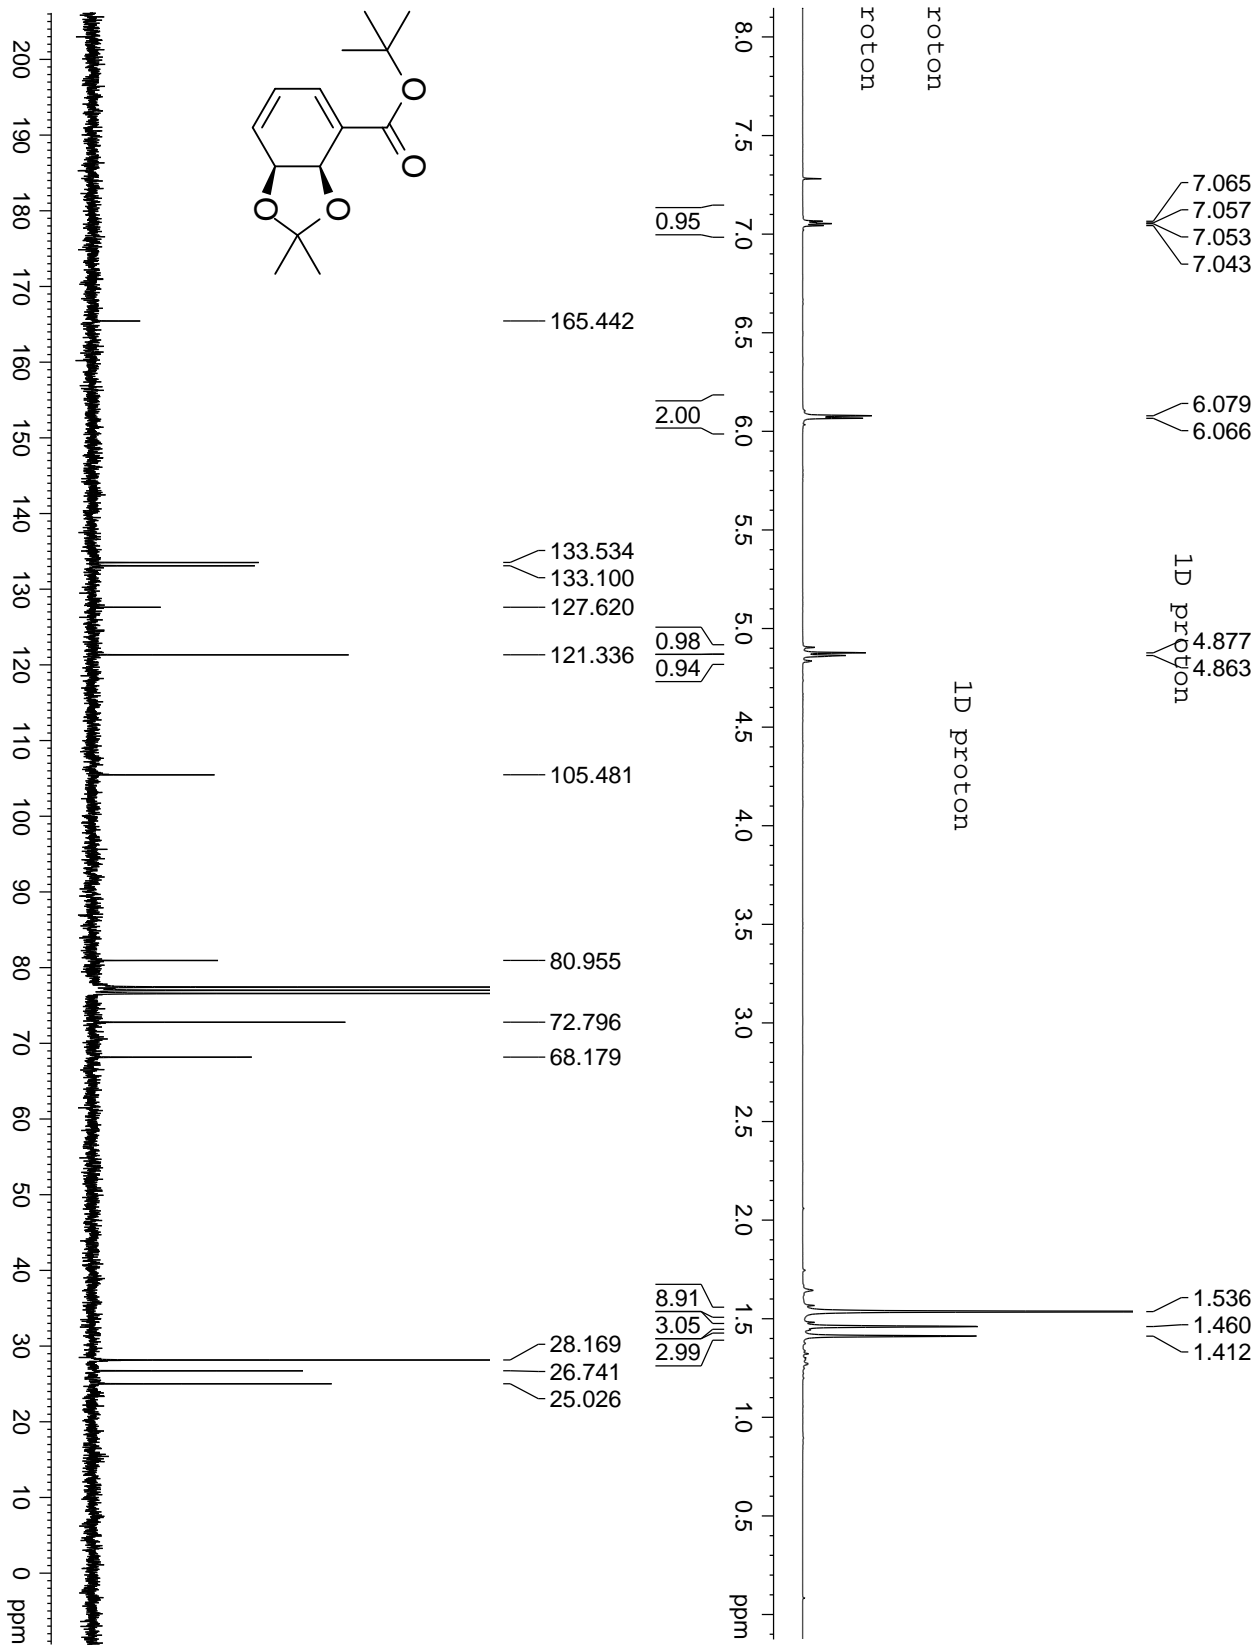

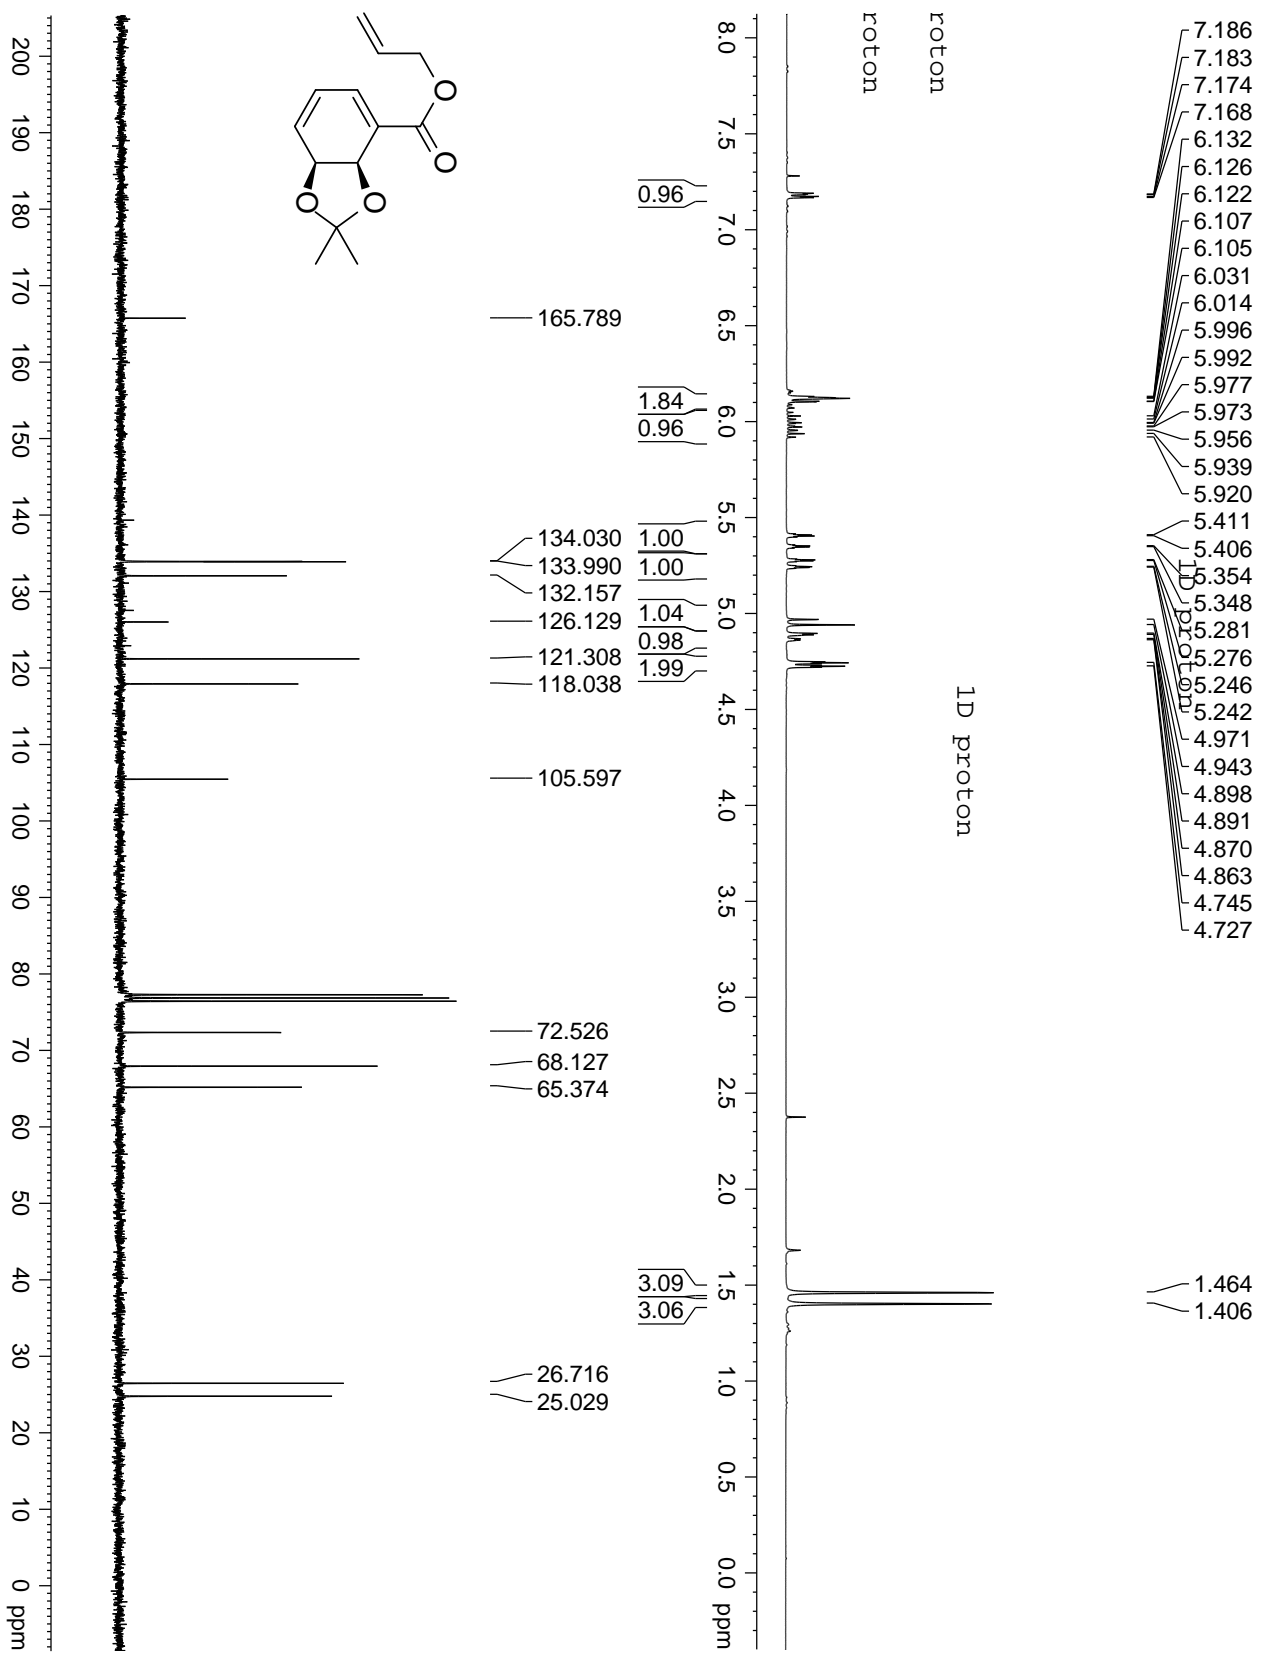



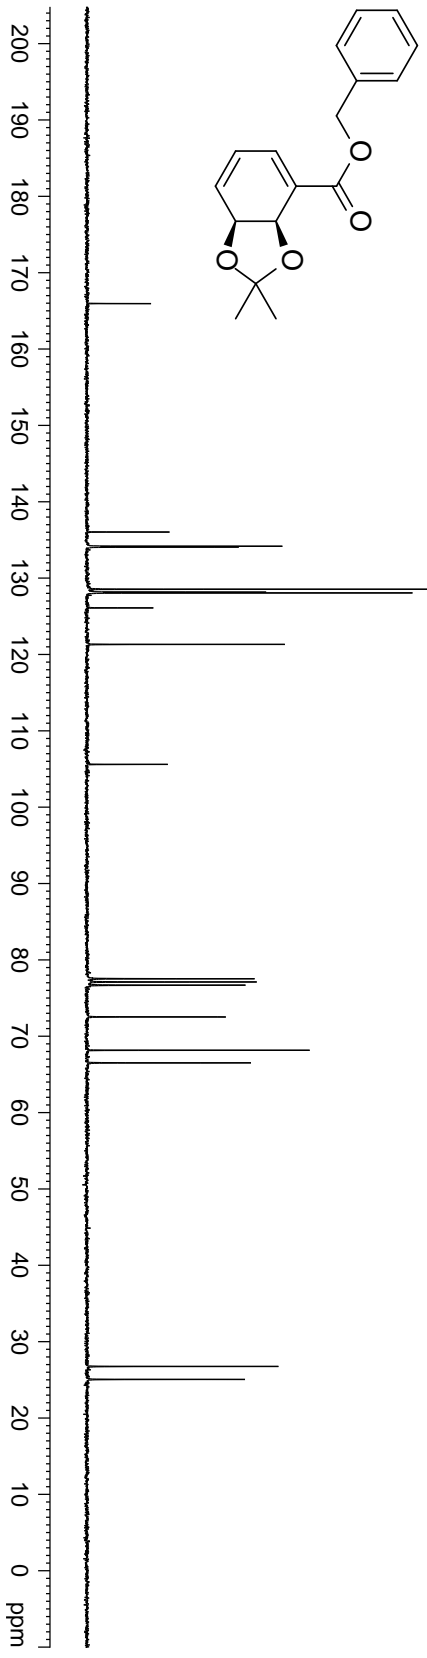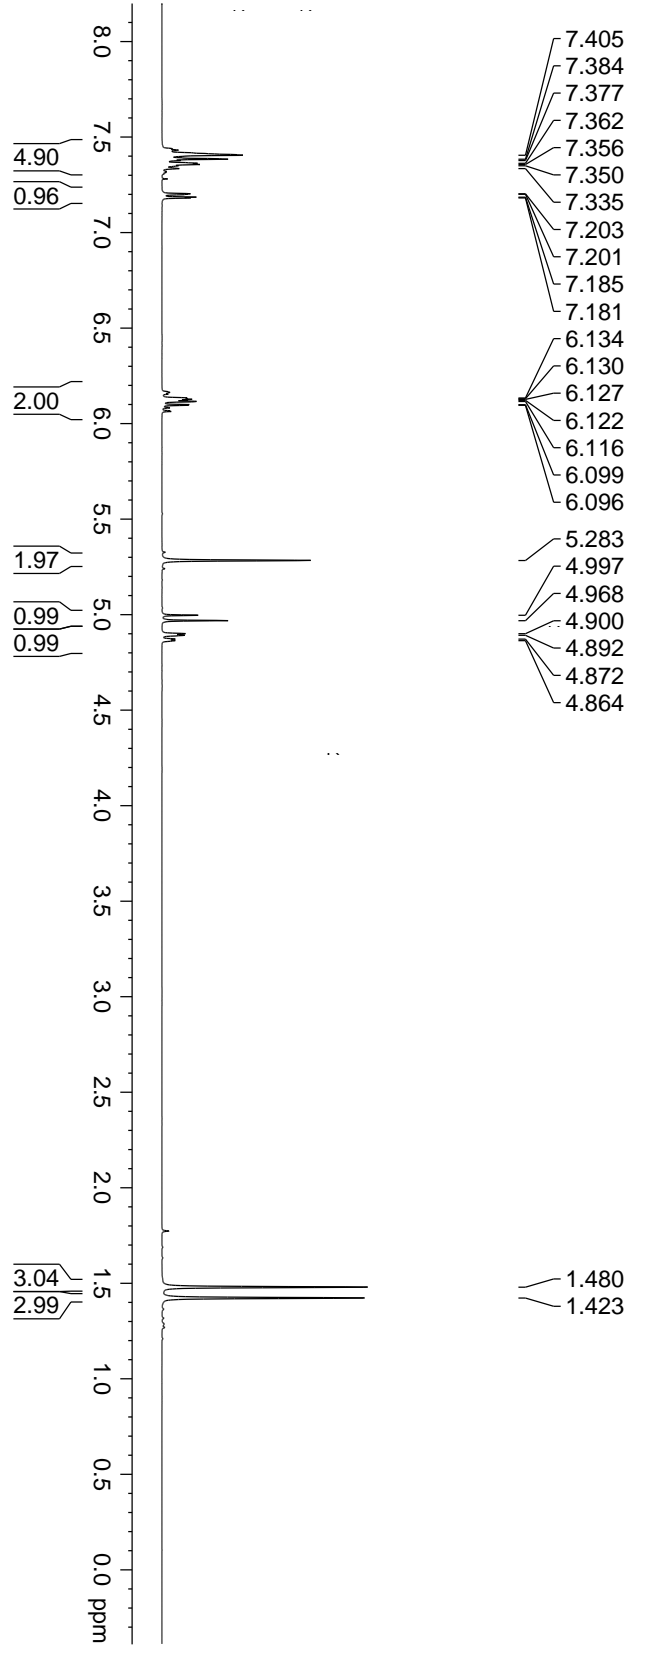

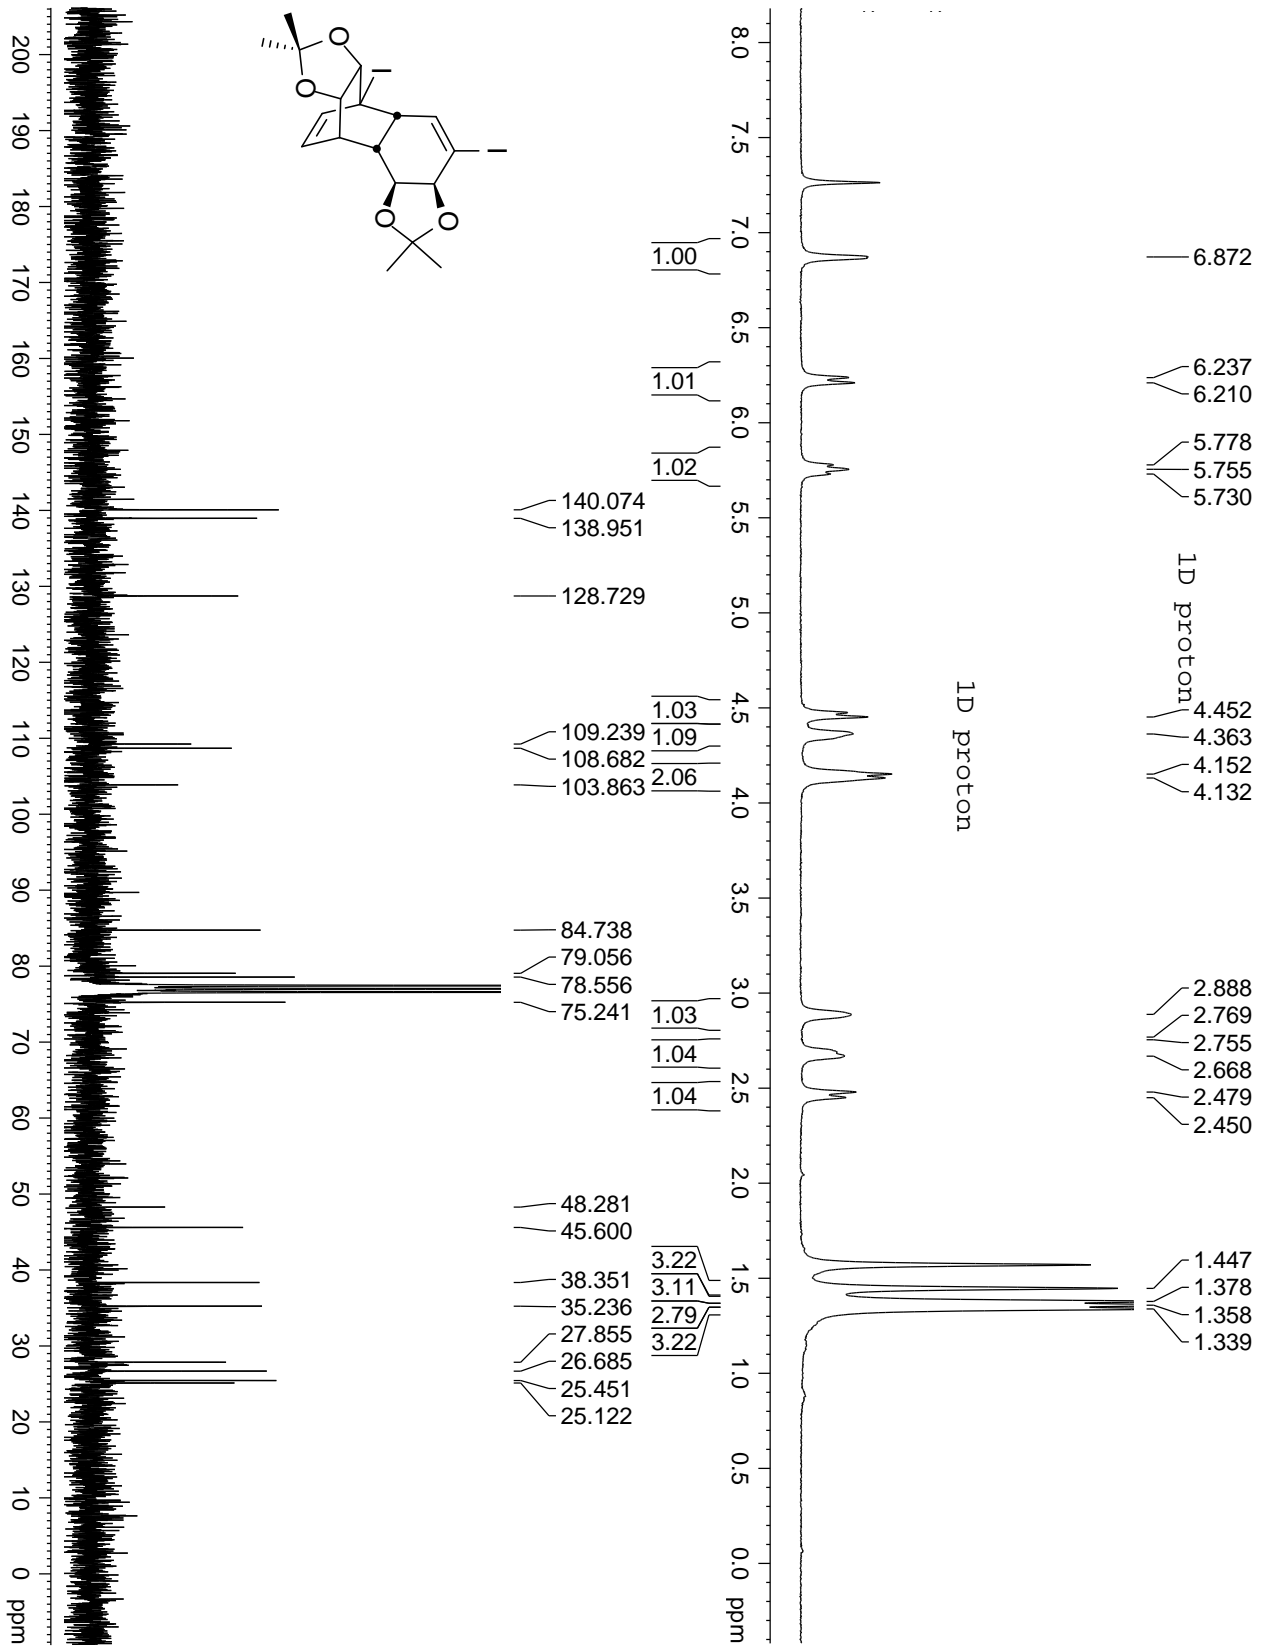

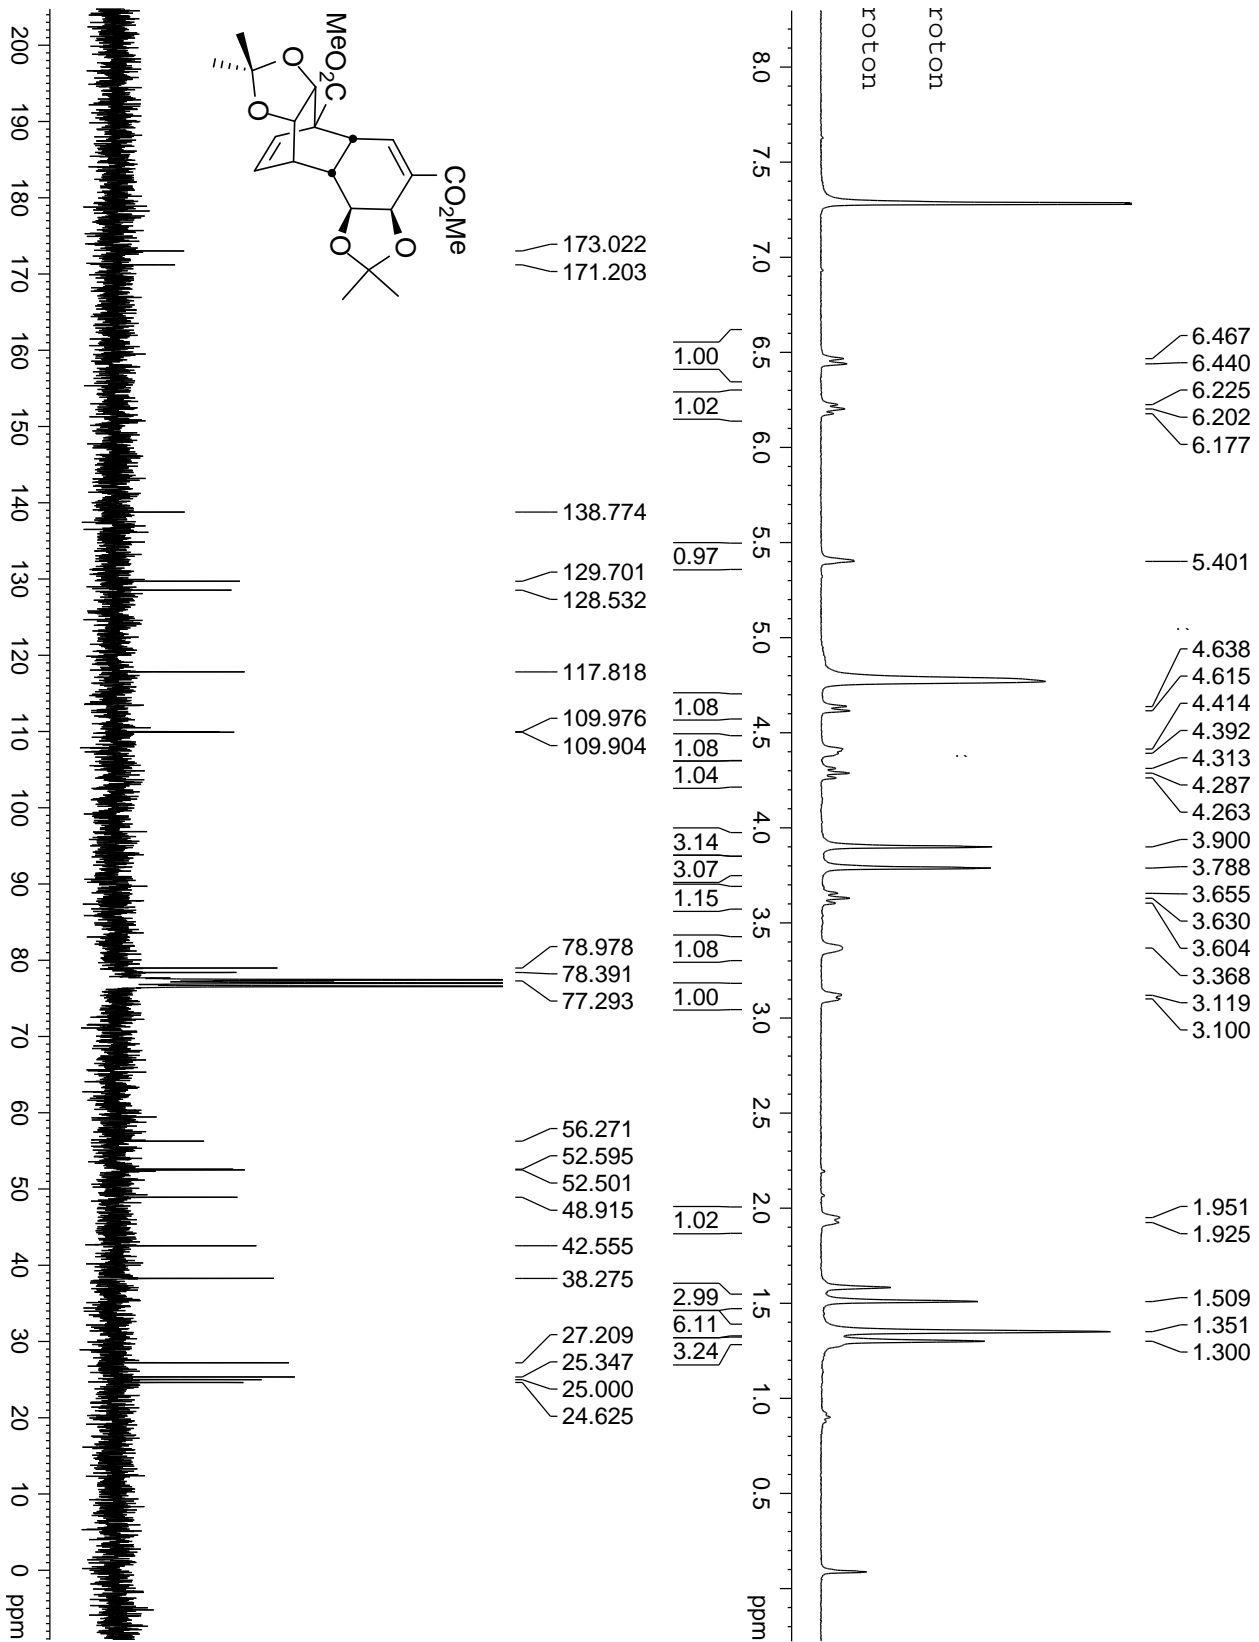

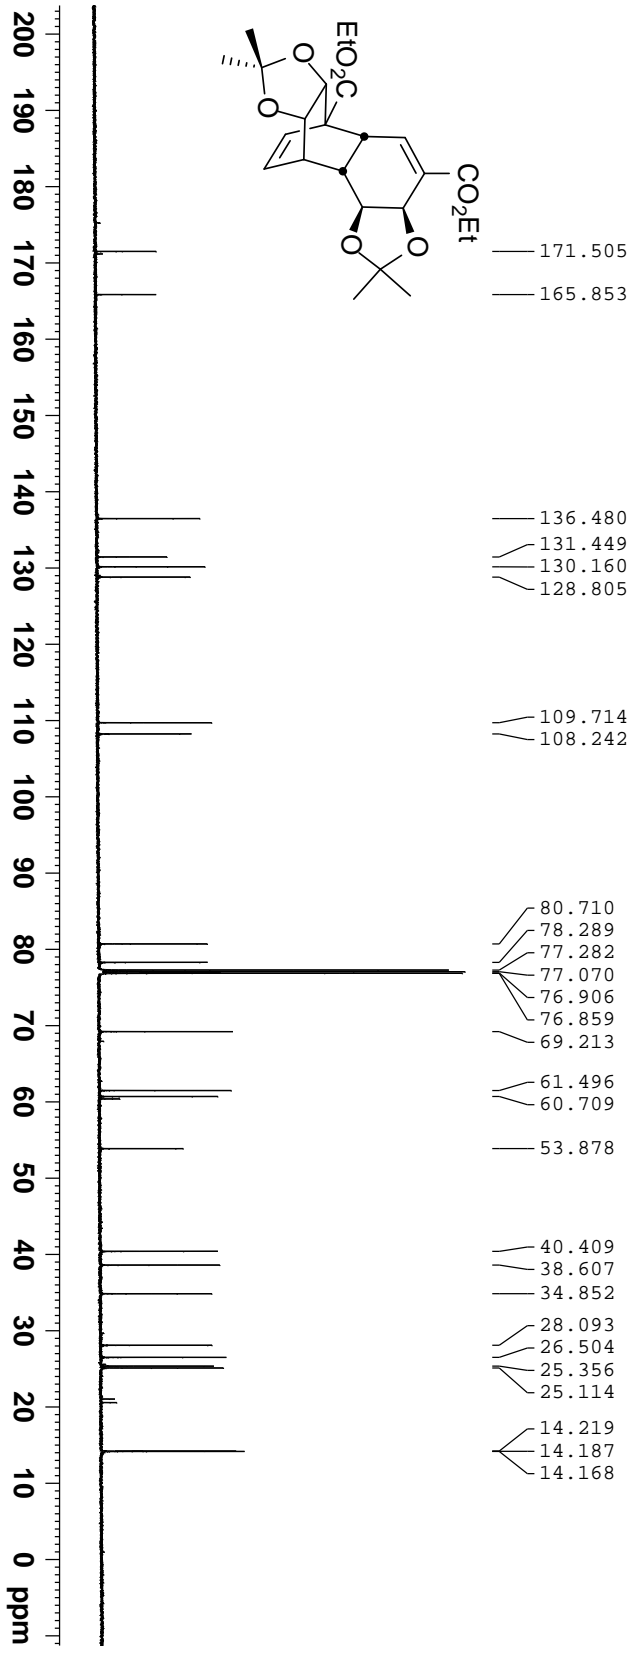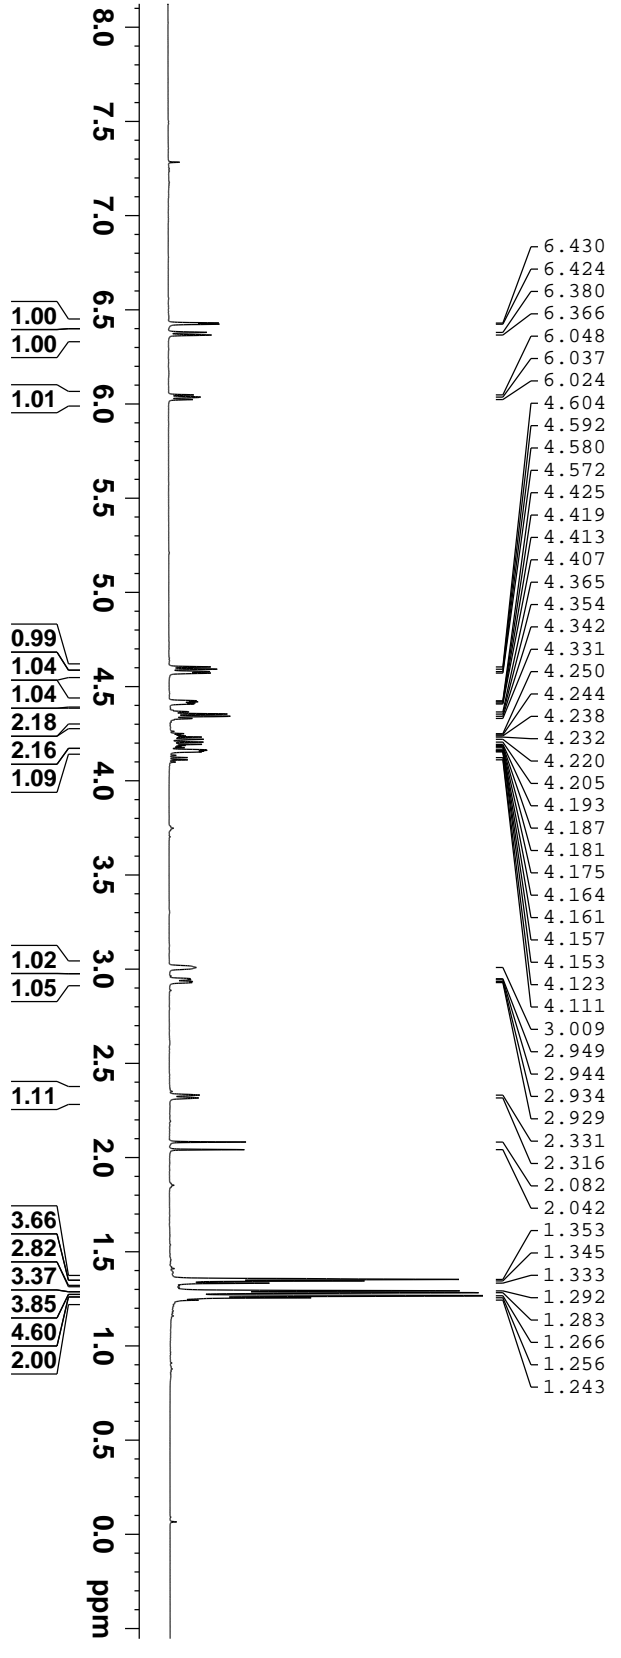

Supplement: c4ob01417k1.pdf [file c4ob01417k1.pdf]
