# Supplementary material for: Palladium-catalyzed carbonylation of halo arene-cis-dihydrodiols to the corresponding carboxylates. Access to compounds unavailable by toluene dioxygenase-mediated dihydroxylation of the corresponding benzoate esters
Source: Royal Society of Chemistry journal article supplement (doi:10.1039/c4ob01417k), 2014-01-01
Supplement: c4ob01417k2.pdf [file c4ob01417k2.pdf]

## Supplementary Information

### **Palladium-catalyzed carbonylation of halo arene-*cis*-dihydrodiols to the corresponding carboxylates. Access to compounds unavailable by toluene dioxygenase-mediated dihydroxylation of the corresponding benzoate esters**

Jordan Froese, Jason Reed Hudlicky, and Tomas Hudlicky\*

\*Chemistry Department and Centre for Biotechnology, Brock University, 500 Glenridge Avenue,  
St. Catharines, Ontario L2S 3A1, Canada

[thudlicky@brocku.ca](mailto:thudlicky@brocku.ca)

### Table of Contents

|                                                                                                  | <b>Page(s)</b> |
|--------------------------------------------------------------------------------------------------|----------------|
| Copies of $^1\text{H}$ and $^{13}\text{C}$ spectra for compounds <b>15, 18, 22, 24-27, 29-32</b> | S2-S12         |

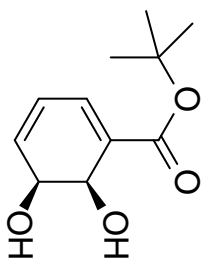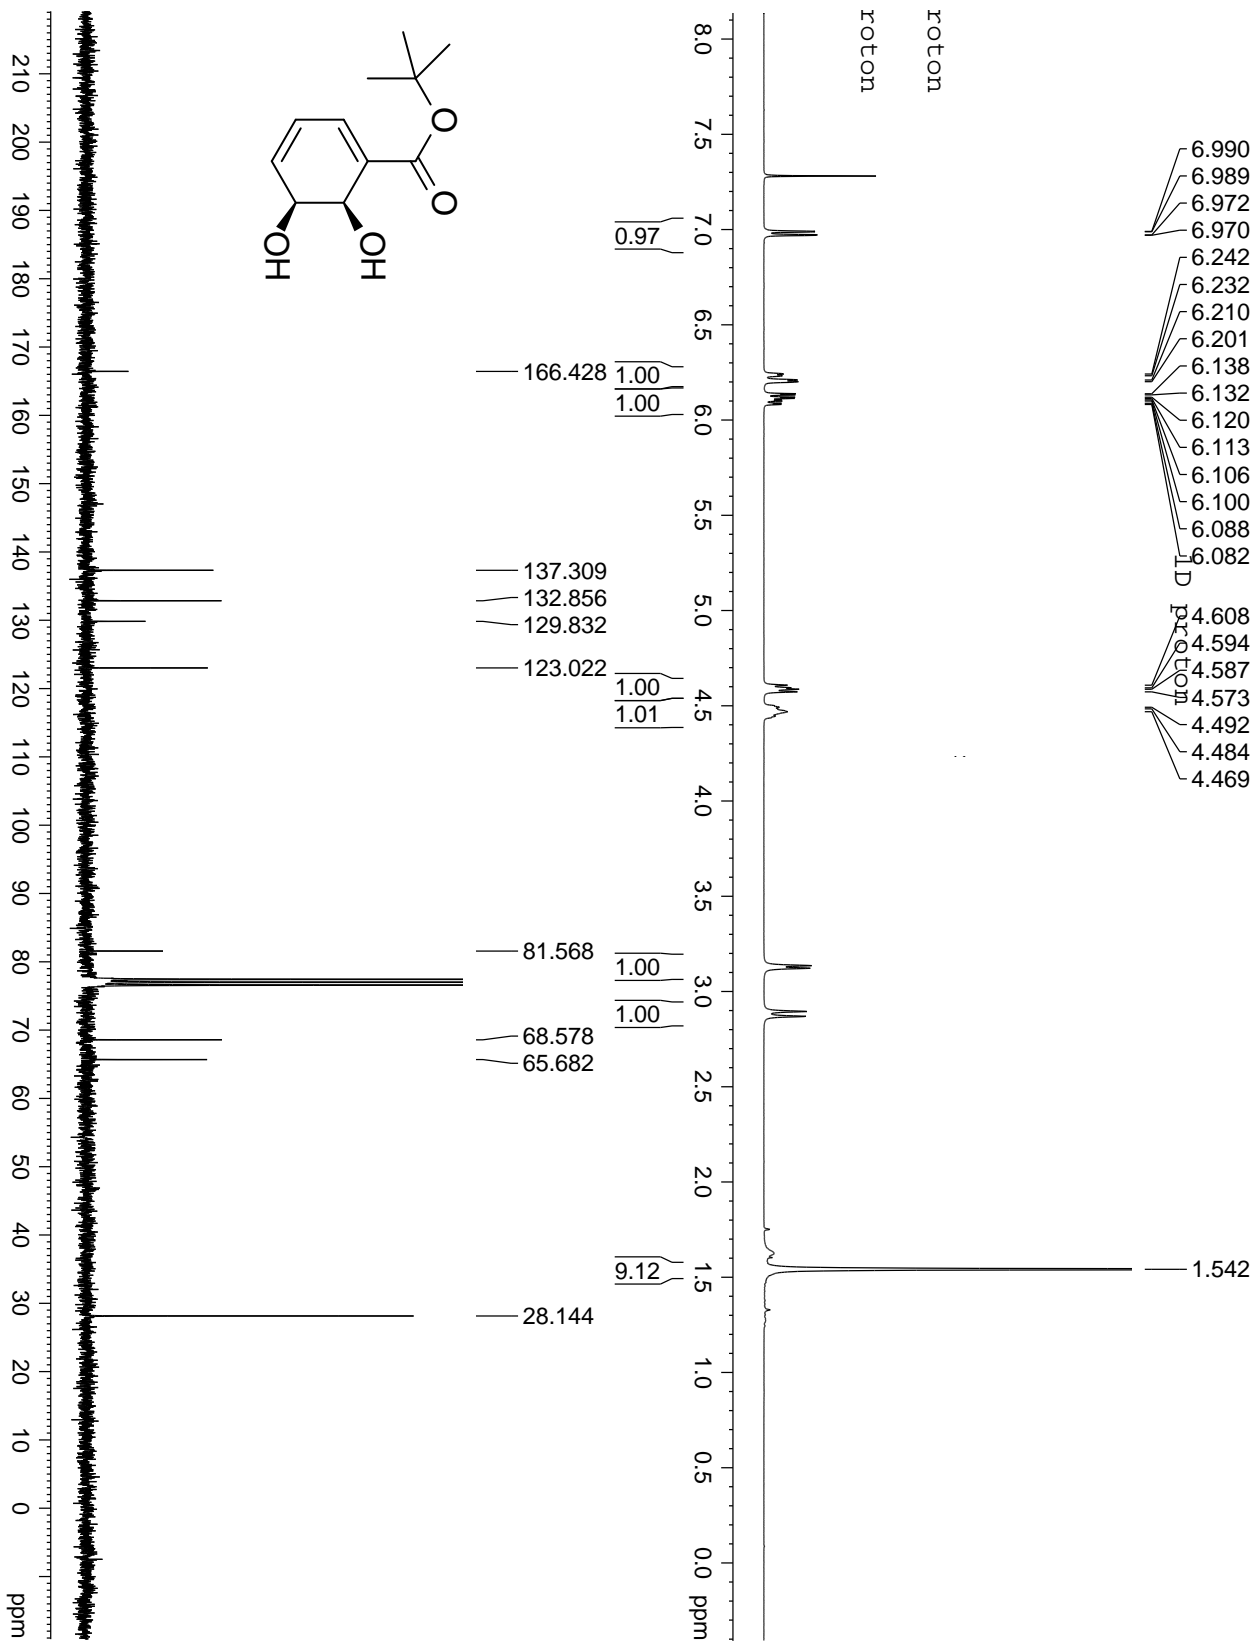

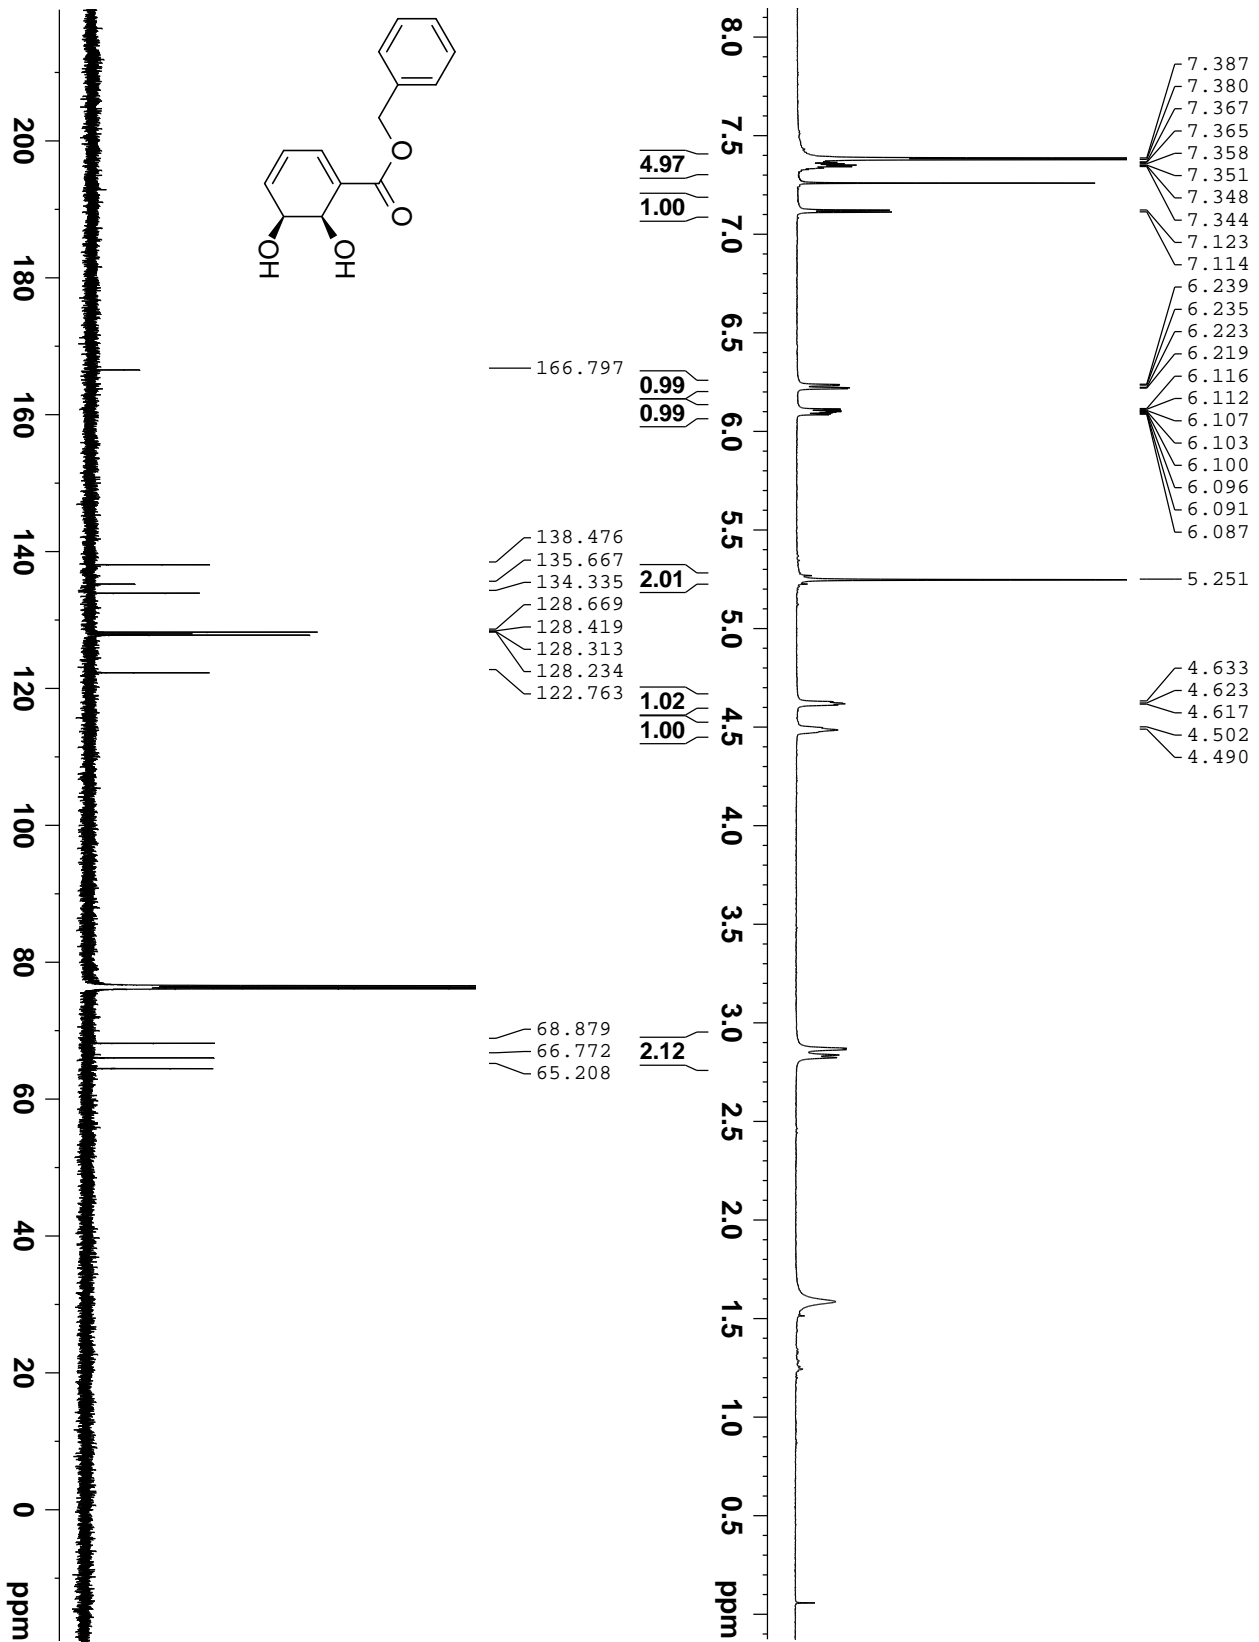

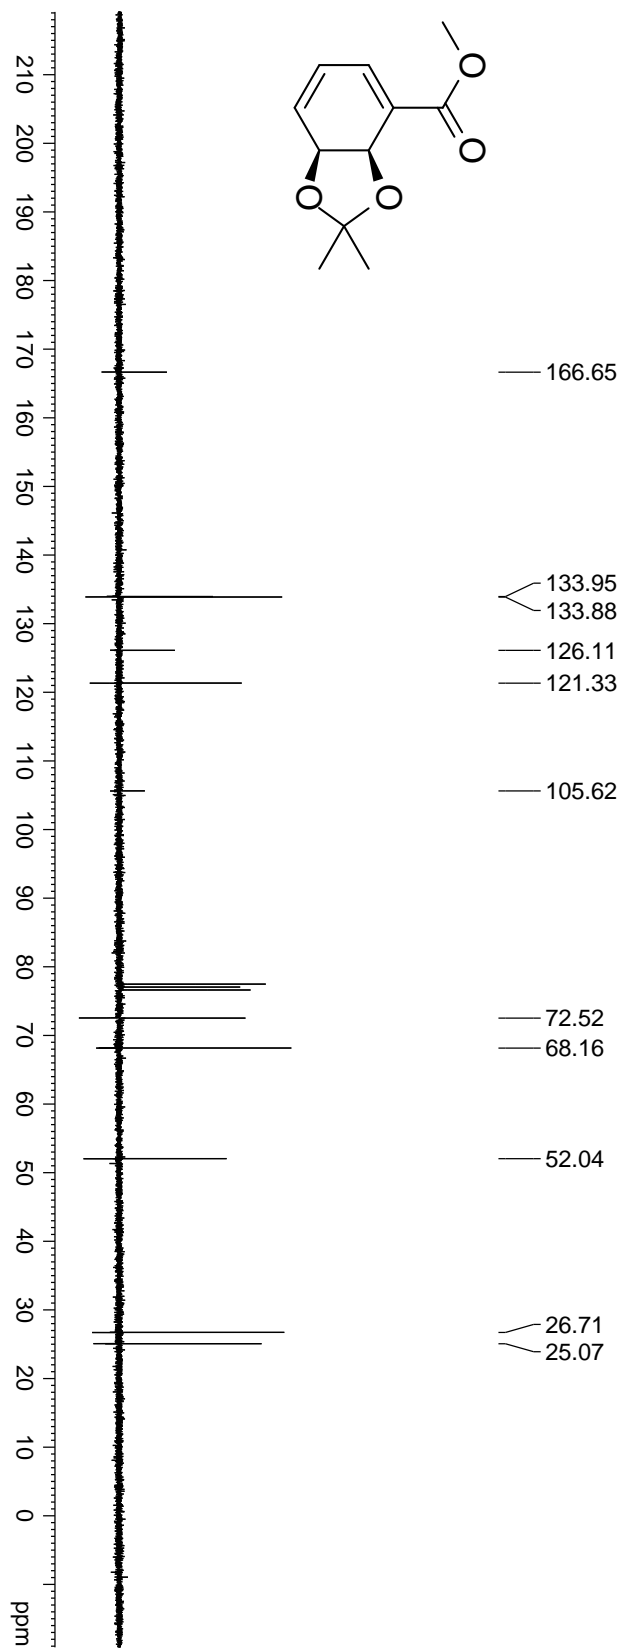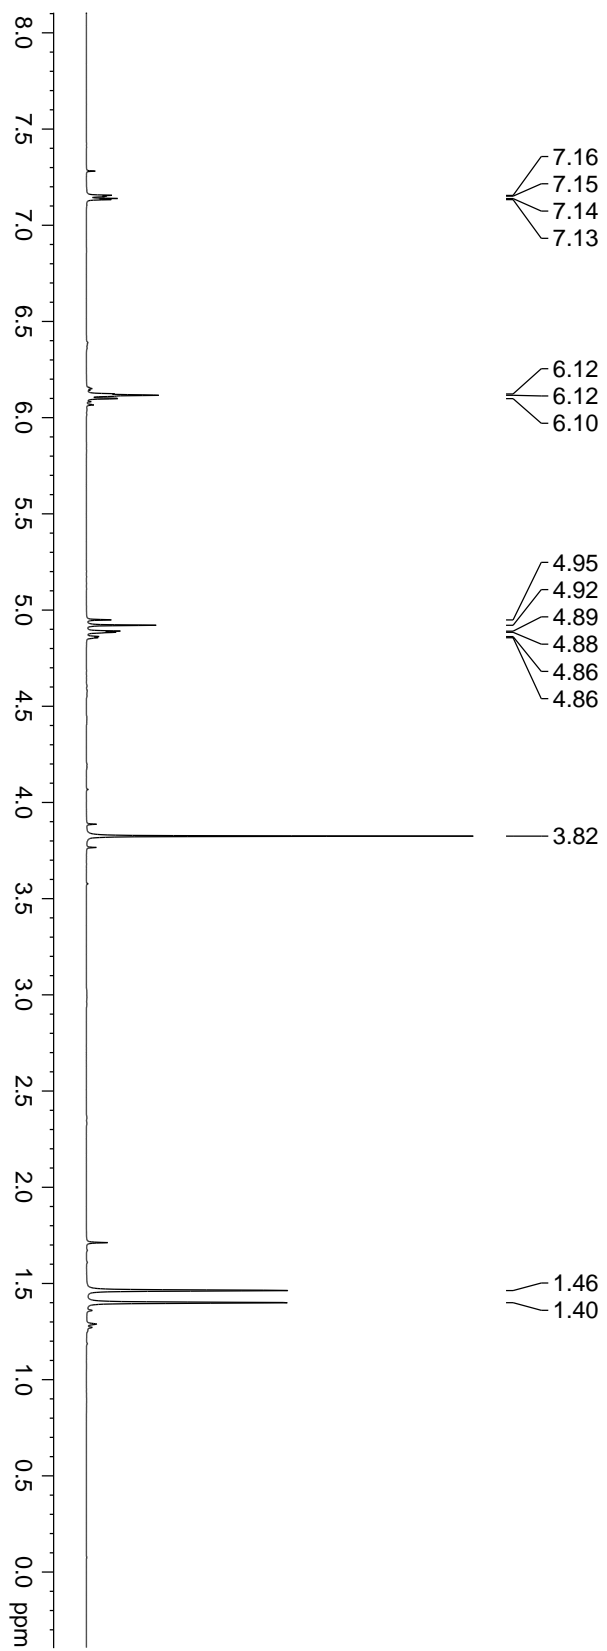

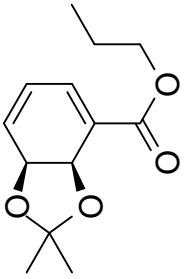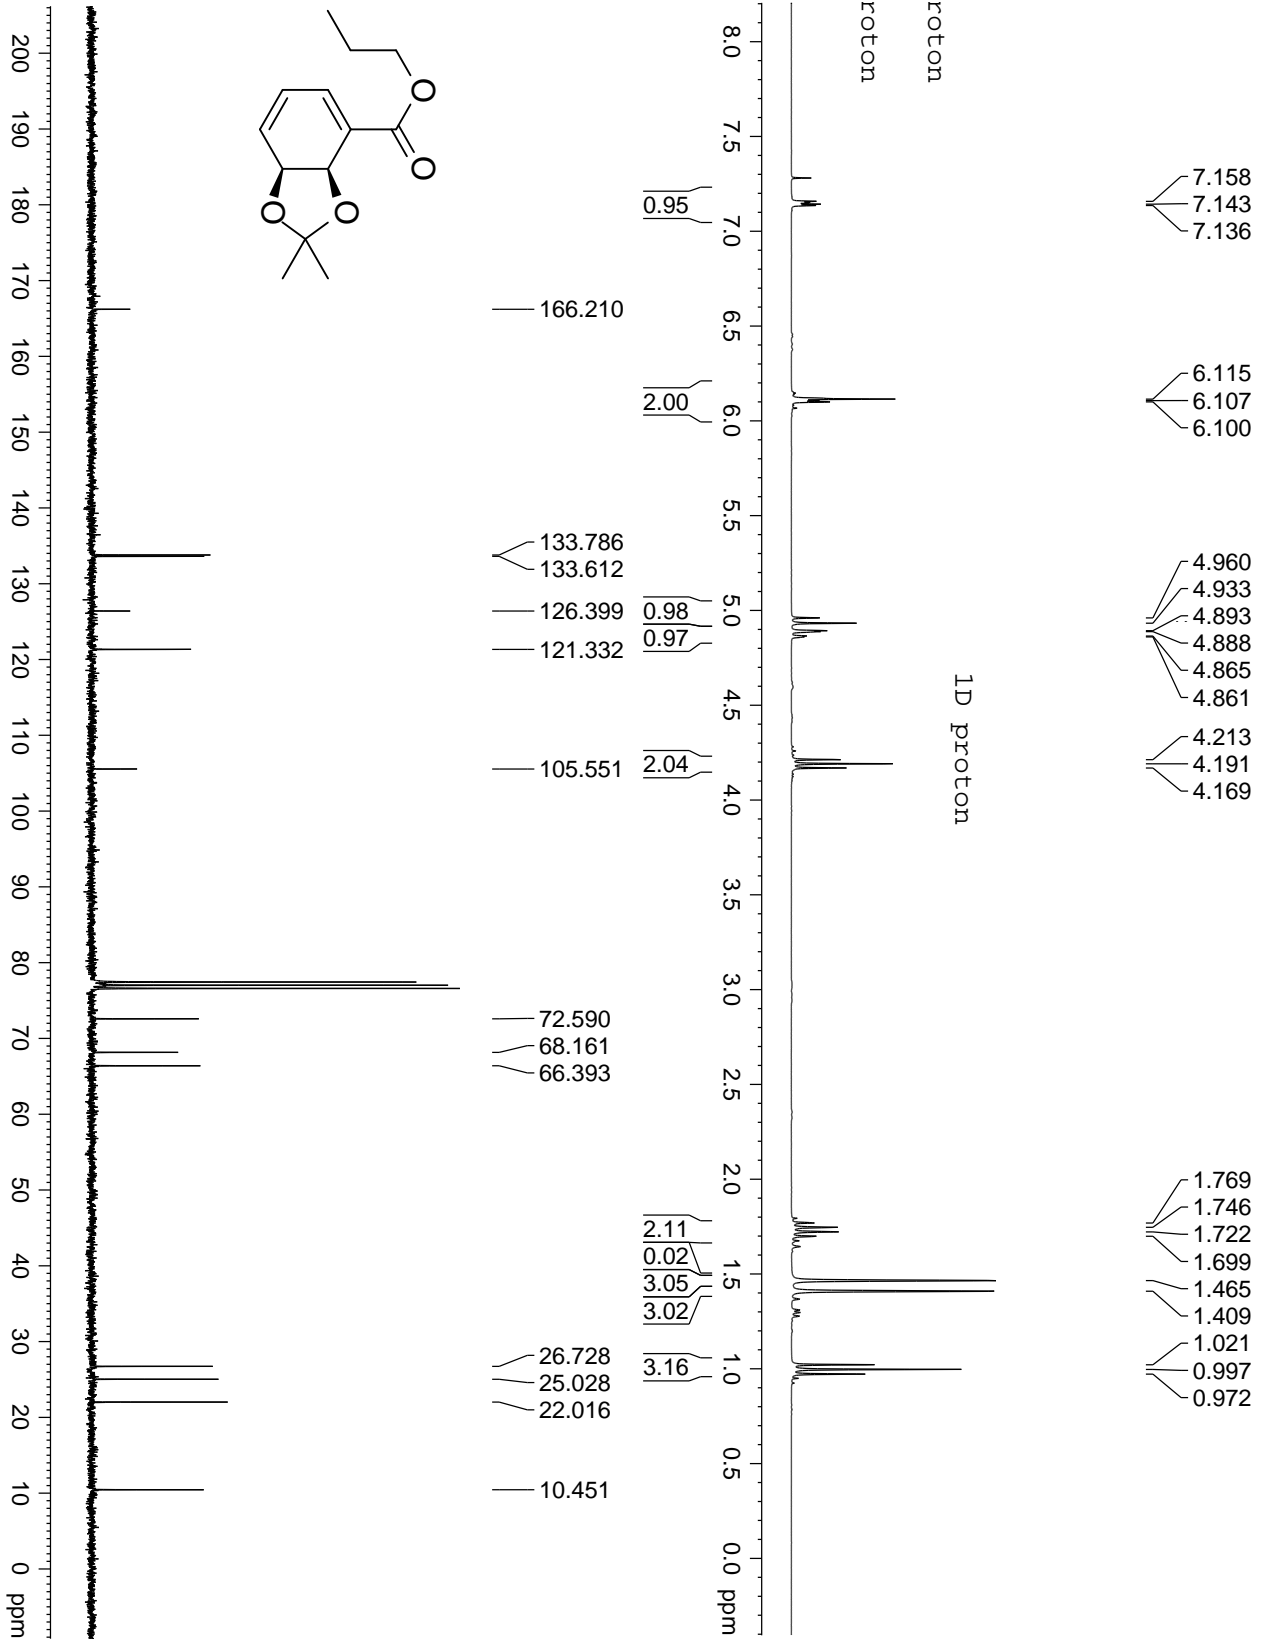

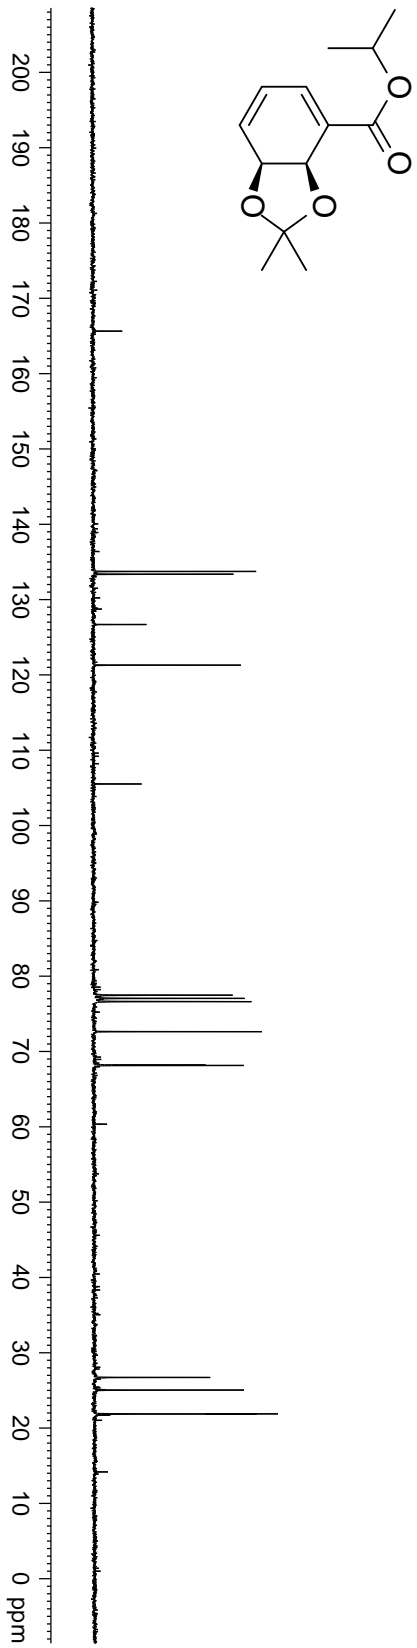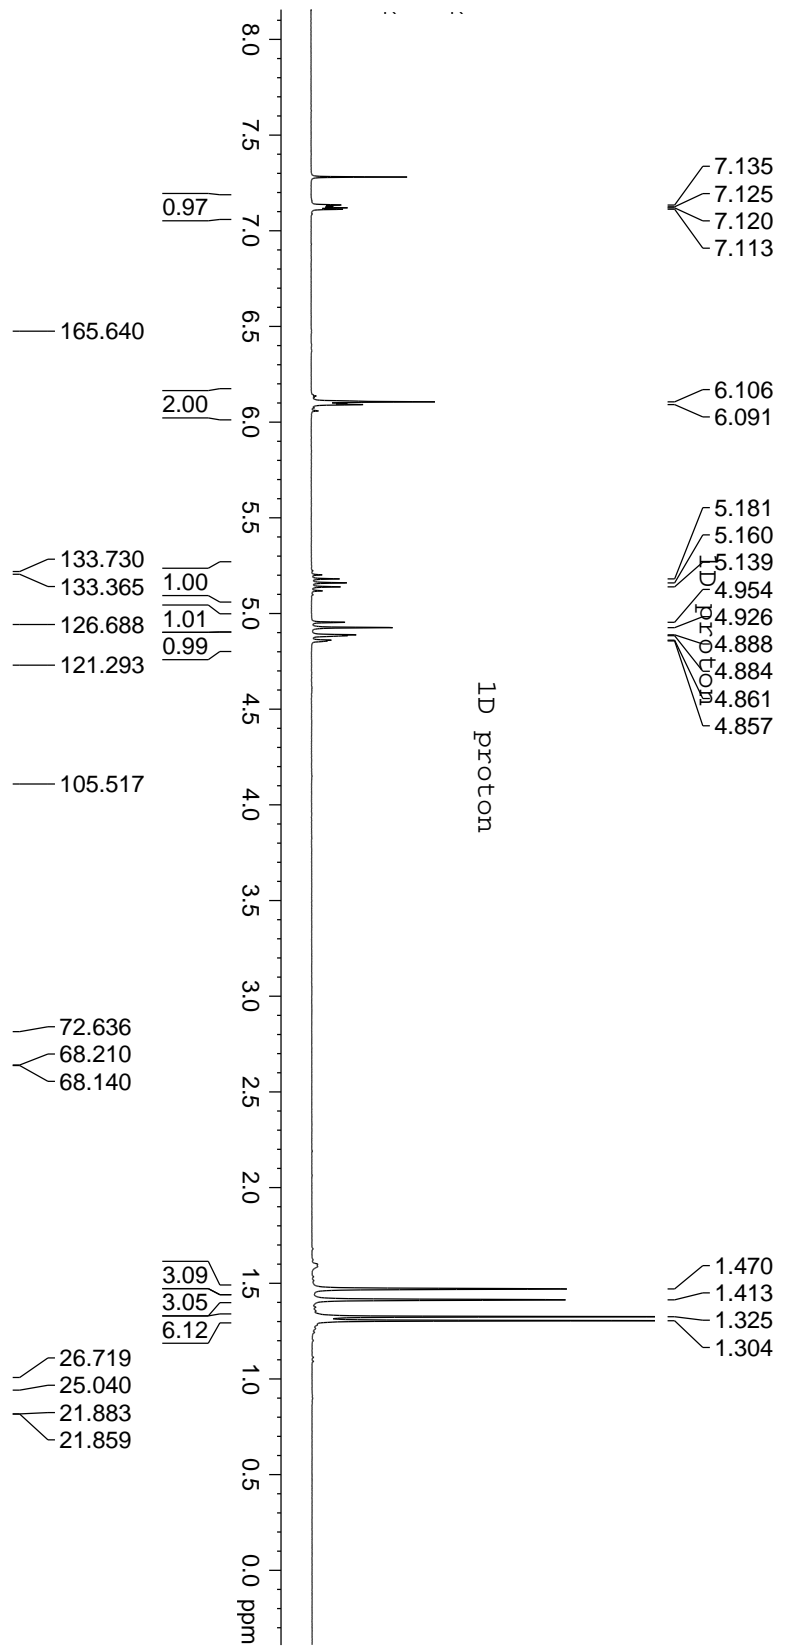

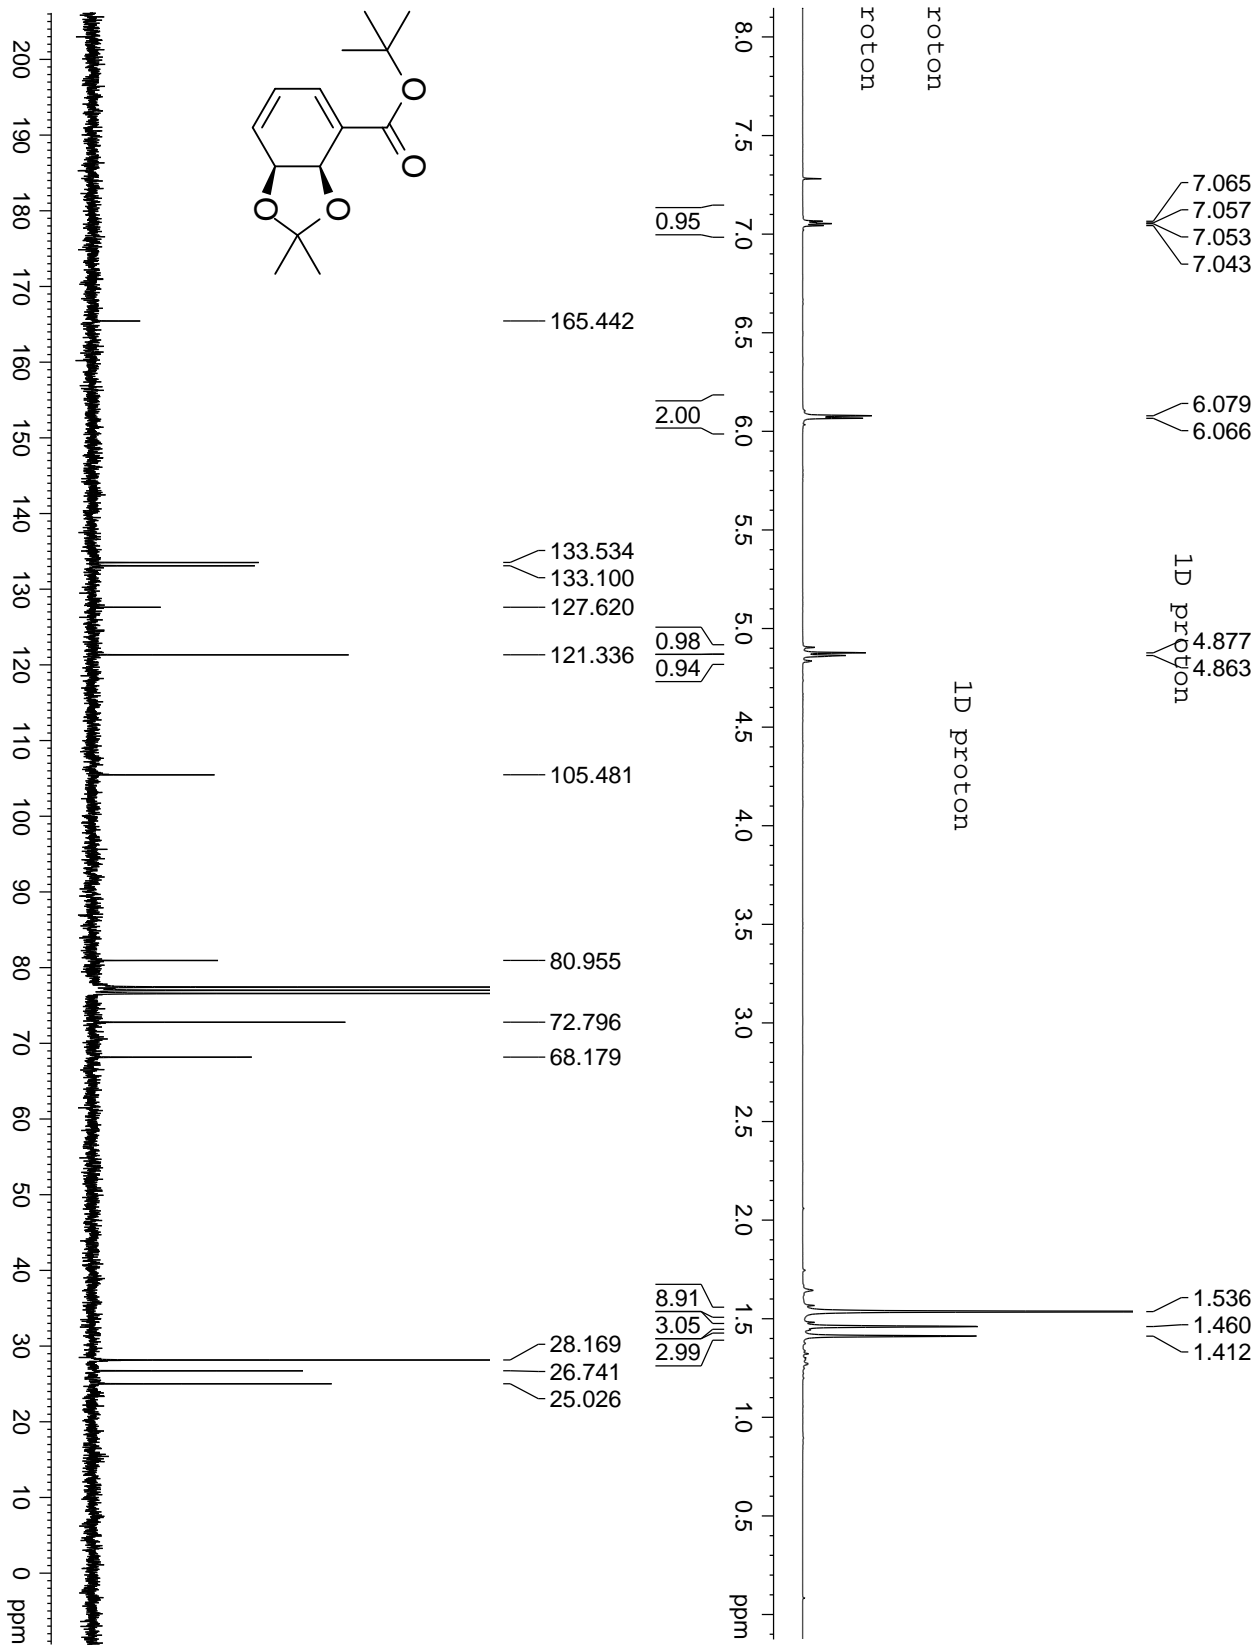

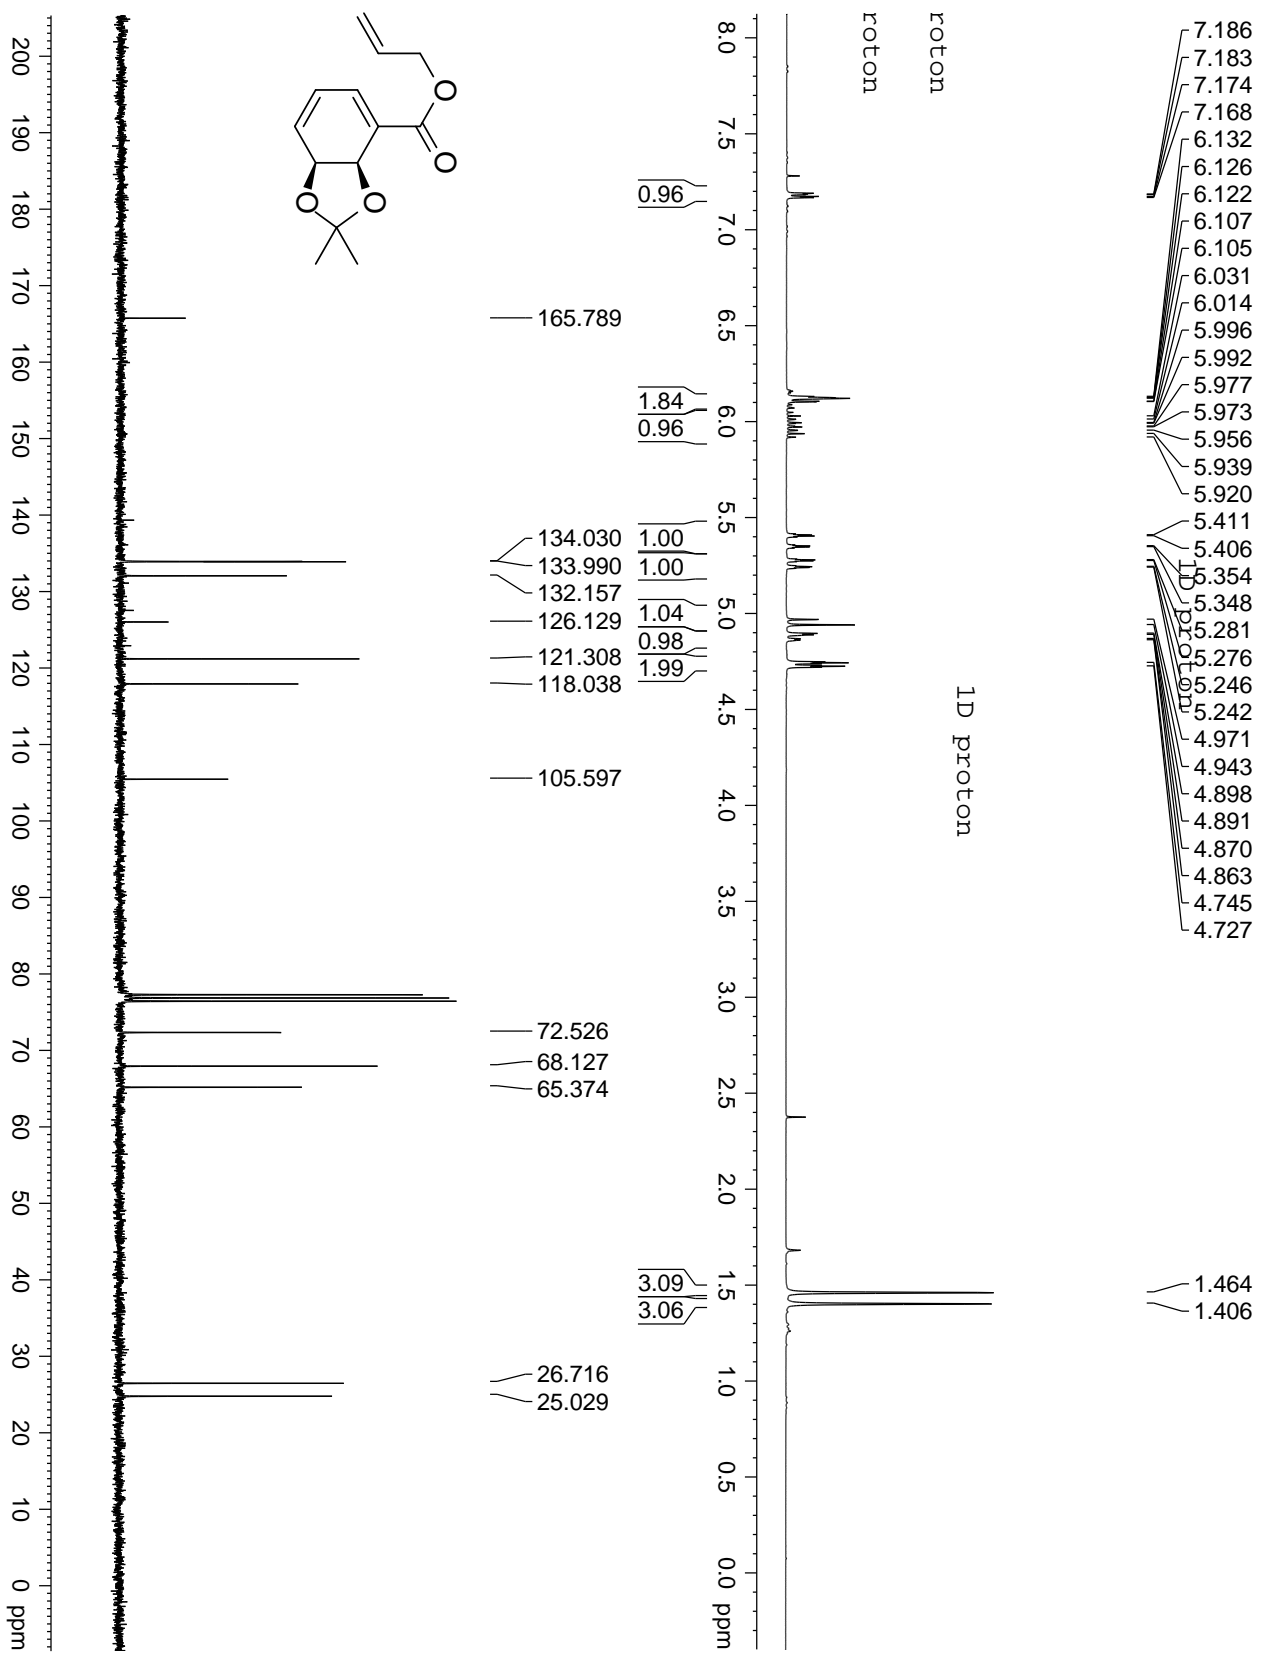



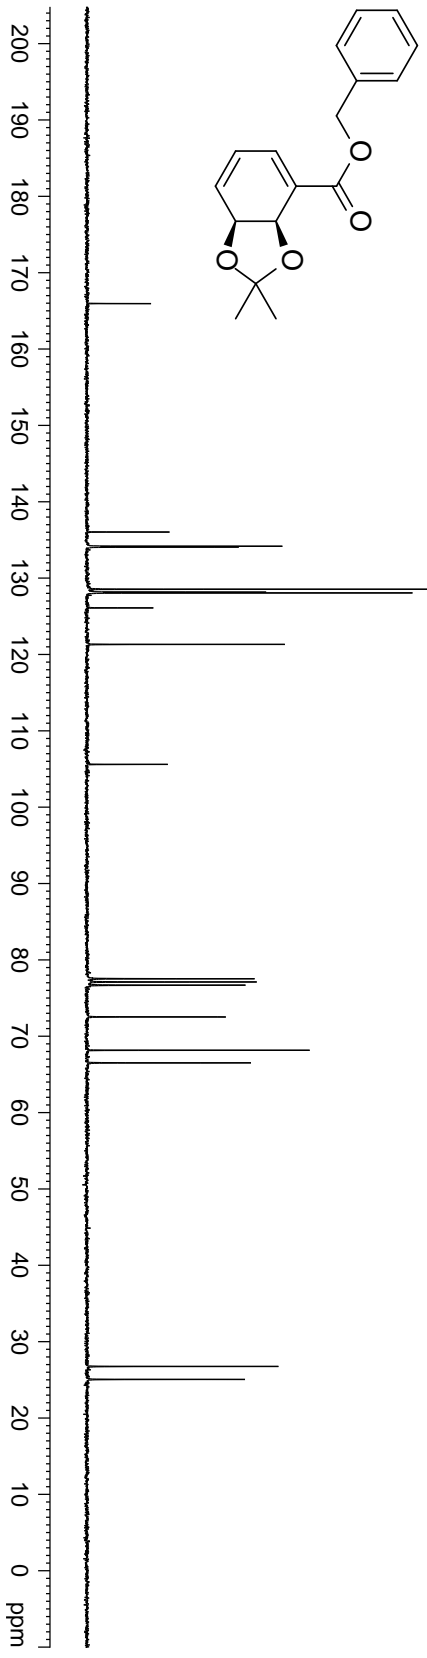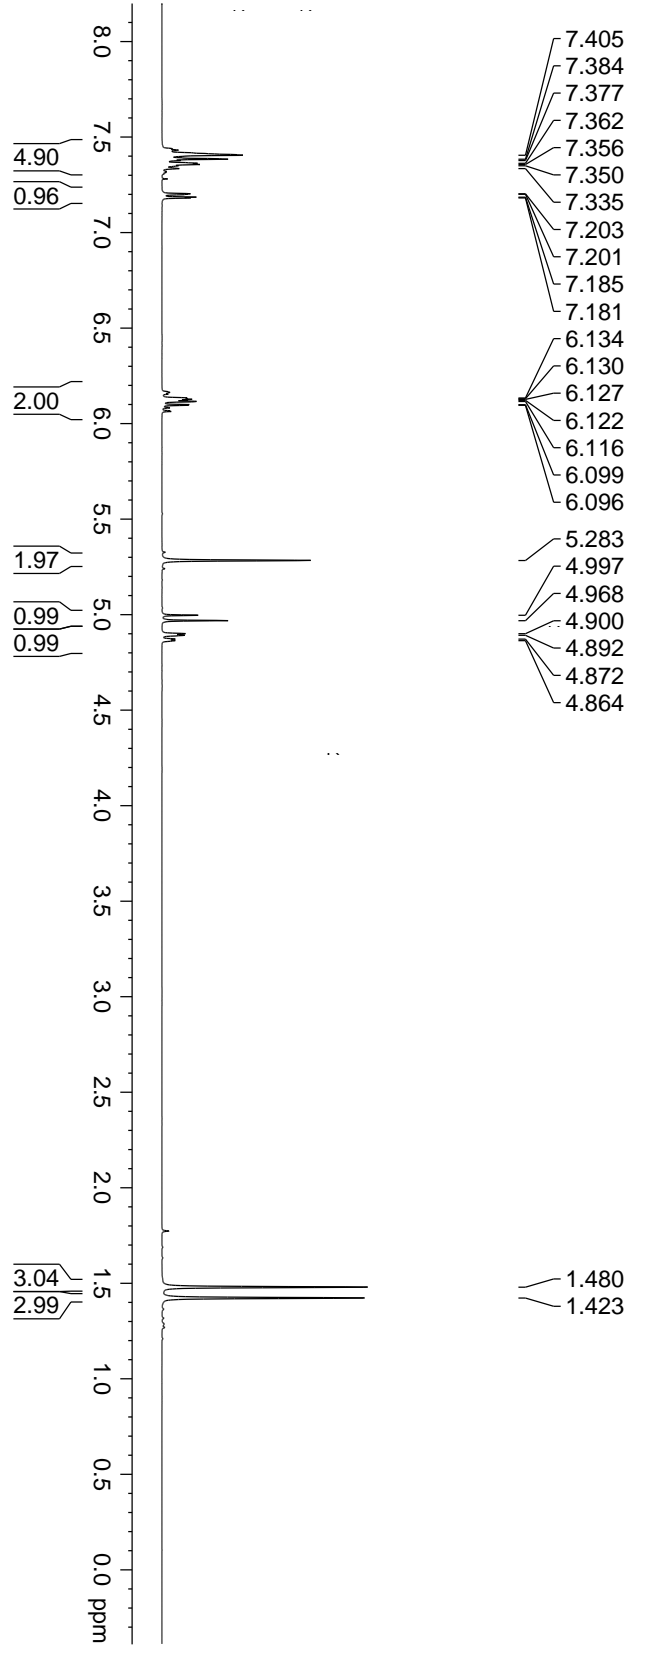

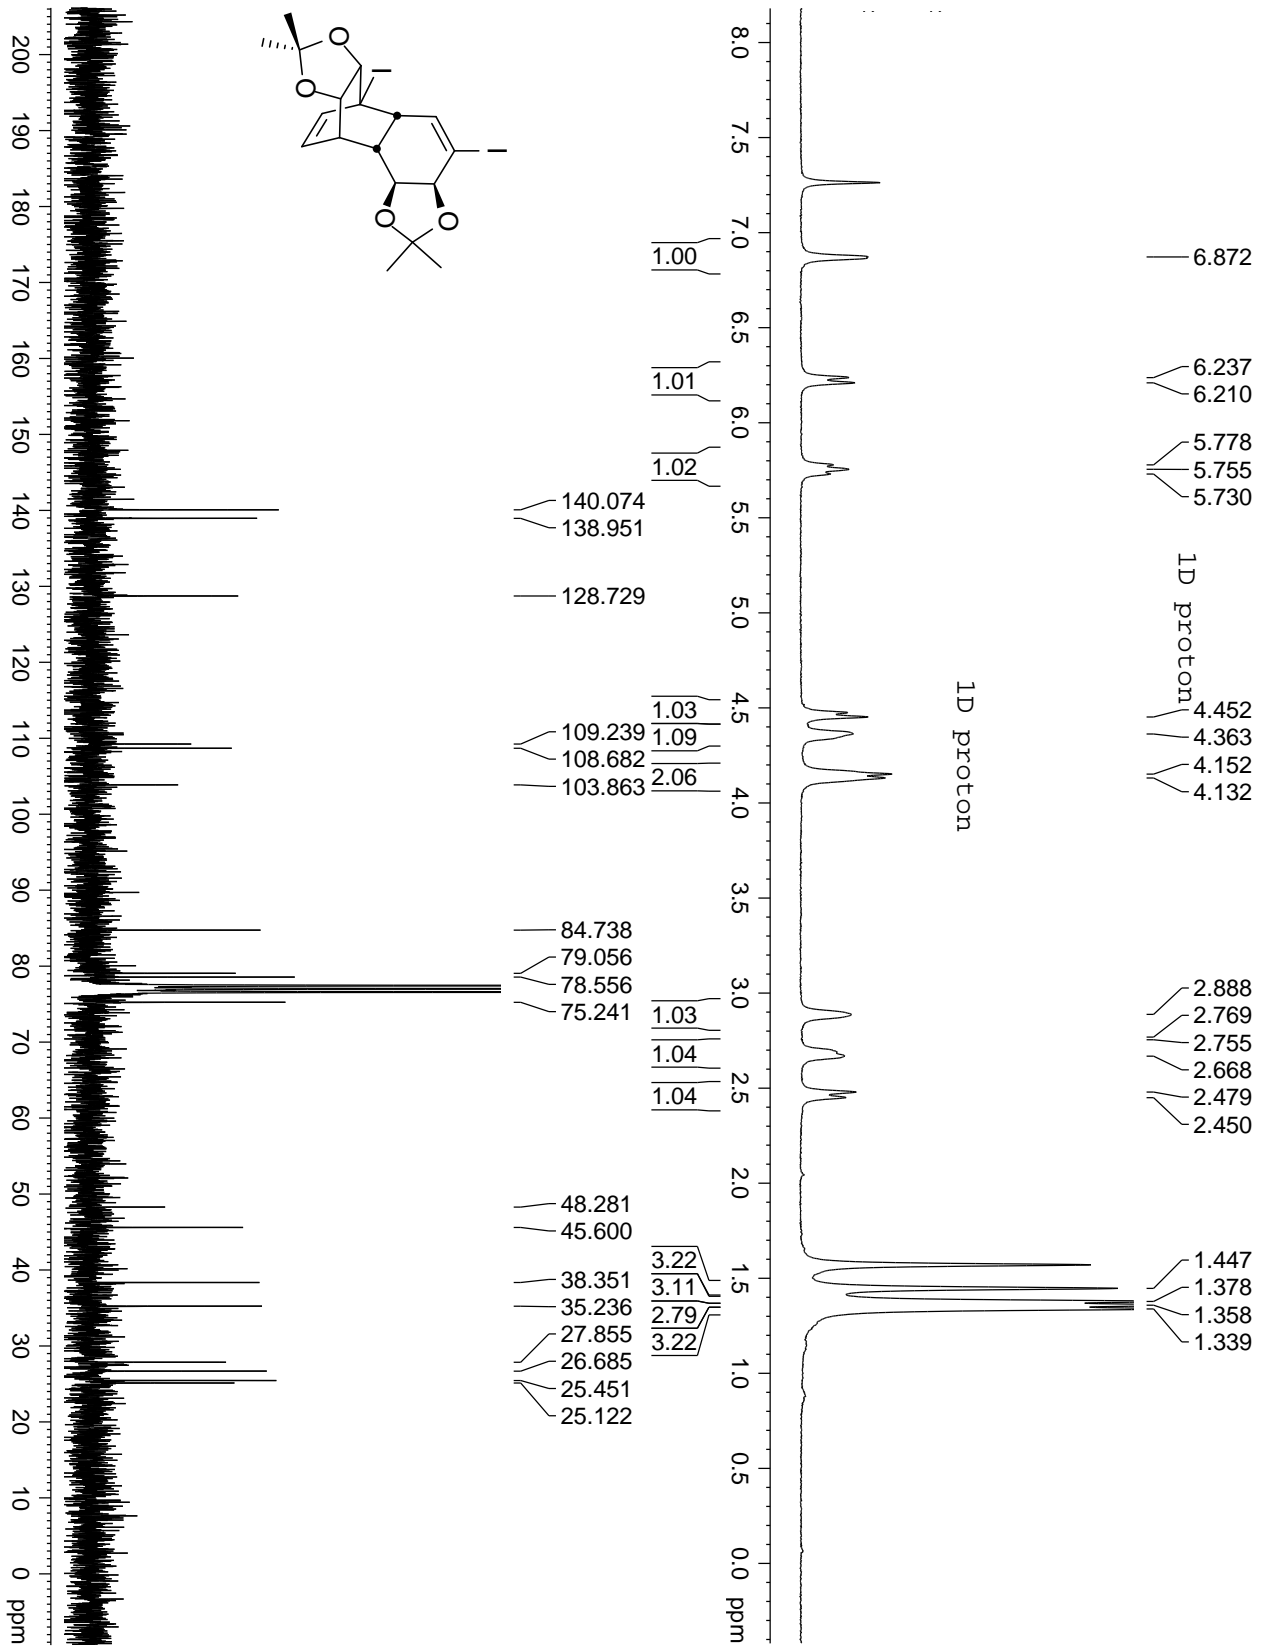

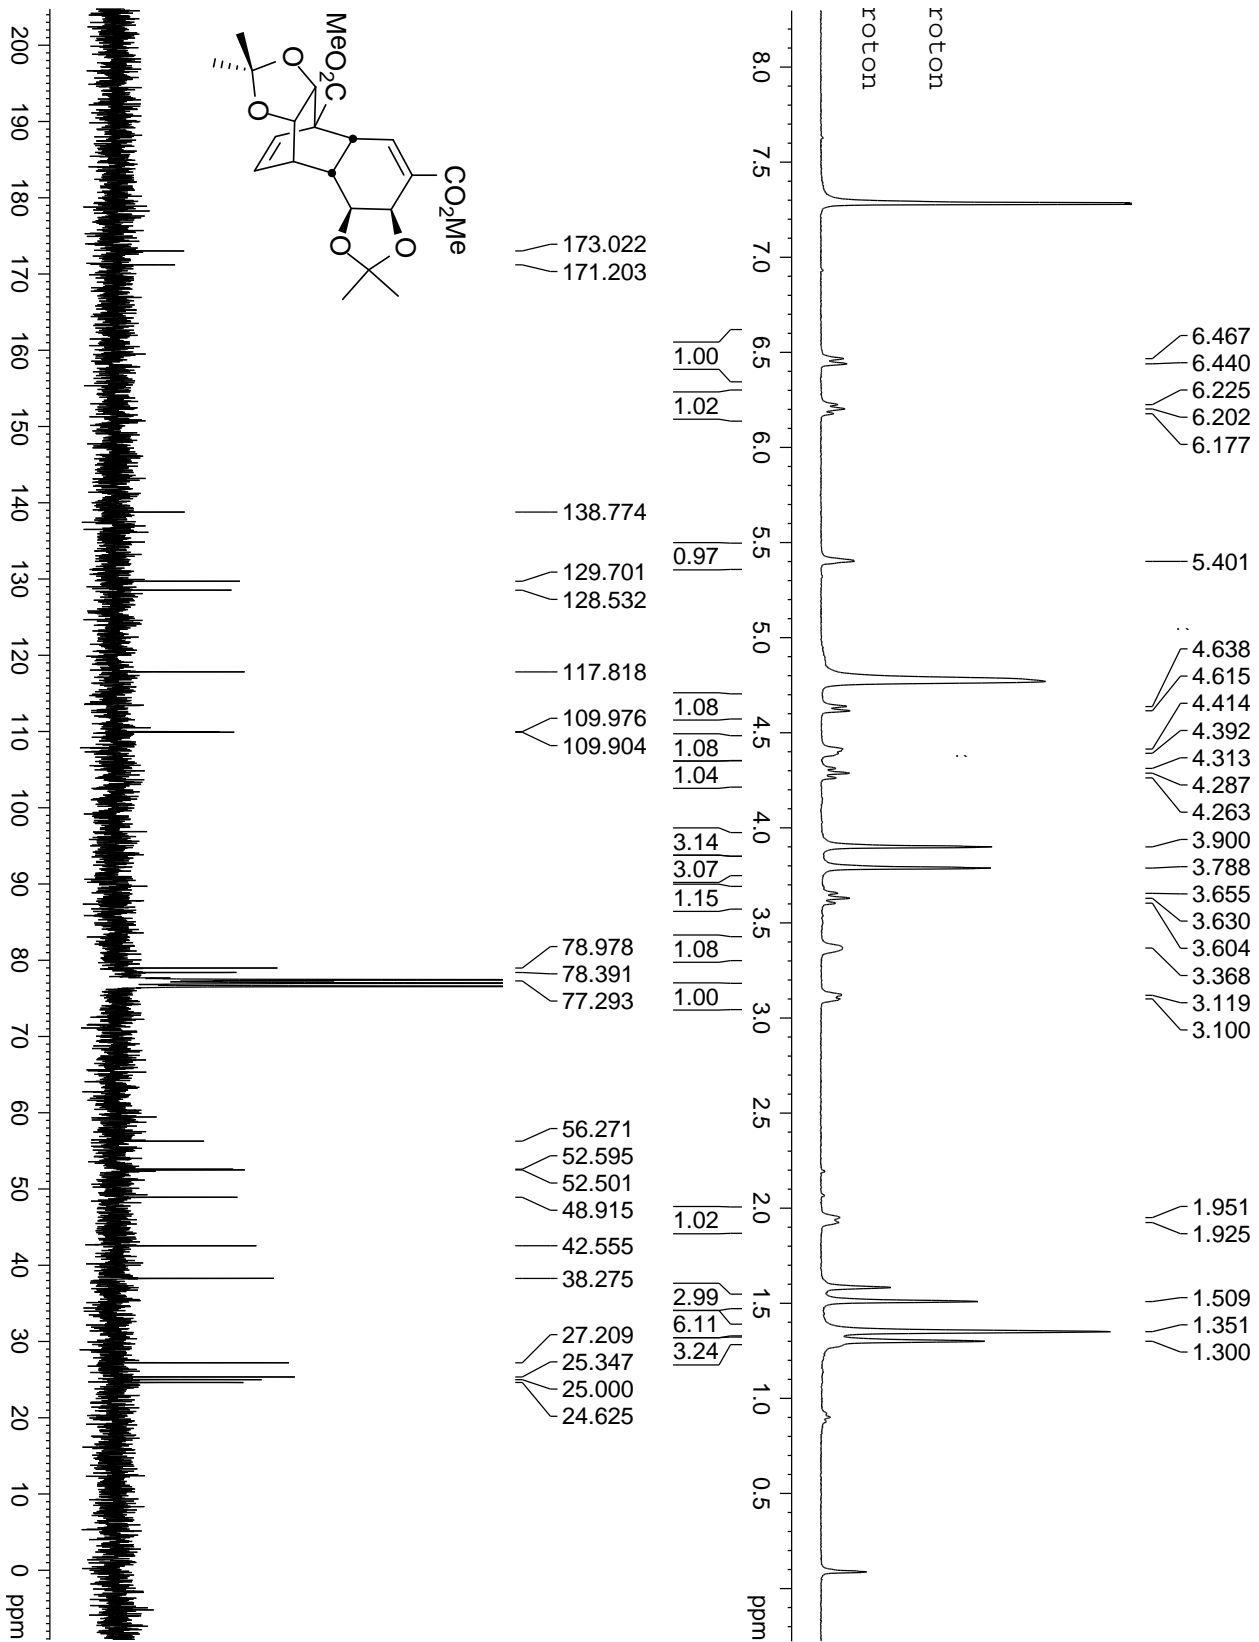

200 190 180 170 160 150 140 130 120 110 100 90 80 70 60 50 40 30 20 10 0 ppm

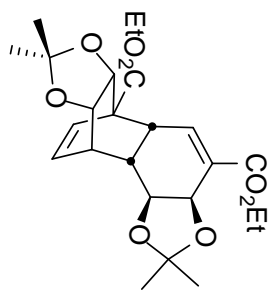

171.505  
165.853  
136.480  
131.449  
130.160  
128.805  
109.714  
108.242  
80.710  
78.289  
77.282  
77.070  
76.906  
76.859  
69.213  
61.496  
60.709  
53.878  
40.409  
38.607  
34.852  
28.093  
26.504  
25.356  
25.114  
14.219  
14.187  
14.168

1.00  
1.00  
1.01  
0.99  
1.04  
1.04  
2.18  
2.16  
1.09  
1.02  
1.05  
1.11  
3.66  
2.82  
3.37  
3.85  
4.60  
2.00

8.0 7.5 7.0 6.5 6.0 5.5 5.0 4.5 4.0 3.5 3.0 2.5 2.0 1.5 1.0 0.5 0.0 ppm

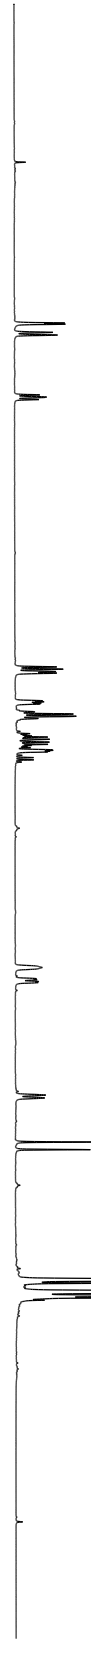

6.430  
6.424  
6.380  
6.366  
6.048  
6.037  
6.024  
4.604  
4.592  
4.580  
4.572  
4.425  
4.419  
4.413  
4.407  
4.365  
4.354  
4.342  
4.331  
4.250  
4.244  
4.238  
4.232  
4.220  
4.205  
4.193  
4.187  
4.181  
4.175  
4.164  
4.161  
4.157  
4.153  
4.123  
4.111  
3.009  
2.949  
2.944  
2.934  
2.929  
2.331  
2.316  
2.082  
2.042  
1.353  
1.345  
1.333  
1.292  
1.283  
1.266  
1.256  
1.243
